# Supplementary material for: Postnatal epigenetic modification of glucocorticoid receptor gene in preterm infants: a prospective cohort study
Source: PubMed Central journal article supplement — BMJ Open. 2014 Jul 12;4(7):e005318. doi: 10.1136/bmjopen-2014-005318 (PMC4120337; doi:10.1136/bmjopen-2014-005318), 2014-07-12
Supplement: bmjopen-2014-005318.draft_revisions.pdf [file bmjopen-2014-005318.draft_revisions.pdf]

# BMJ Open

## Postnatal Epigenetic Modification of Glucocorticoid Receptor Gene in Preterm Infants

|                                 |                                                                                                                                                                                                                                                                                                                                                                                                                                                                                                                                         |
|---------------------------------|-----------------------------------------------------------------------------------------------------------------------------------------------------------------------------------------------------------------------------------------------------------------------------------------------------------------------------------------------------------------------------------------------------------------------------------------------------------------------------------------------------------------------------------------|
| Journal:                        | <i>BMJ Open</i>                                                                                                                                                                                                                                                                                                                                                                                                                                                                                                                         |
| Manuscript ID:                  | bmjopen-2014-005318                                                                                                                                                                                                                                                                                                                                                                                                                                                                                                                     |
| Article Type:                   | Research                                                                                                                                                                                                                                                                                                                                                                                                                                                                                                                                |
| Date Submitted by the Author:   | 22-Mar-2014                                                                                                                                                                                                                                                                                                                                                                                                                                                                                                                             |
| Complete List of Authors:       | Kantake, Masato; Juntendo University Urayasu Hospital, Perinatal Medical Center<br>Yoshitake, Hiroshi; Juntendo University Graduate School of Medicine, Institute for Environmental & Gender-specific Medicine<br>Araki, Yoshihiko; Juntendo University Graduate School of Medicine, Institute for Environmental & Gender-specific Medicine<br>Ishikawa, Hitoshi; Yamagata Saisei Hospital, Department of Health Information Management<br>Shimizu, Toshiaki; Juntendo University Graduate School of Medicine, Department of Pediatrics |
| <b>Primary Subject Heading</b>: | Paediatrics                                                                                                                                                                                                                                                                                                                                                                                                                                                                                                                             |
| Secondary Subject Heading:      | Immunology (including allergy)                                                                                                                                                                                                                                                                                                                                                                                                                                                                                                          |
| Keywords:                       | NEONATOLOGY, Molecular biology < TROPICAL MEDICINE, Paediatric endocrinology < PAEDIATRICALS                                                                                                                                                                                                                                                                                                                                                                                                                                            |
|                                 |                                                                                                                                                                                                                                                                                                                                                                                                                                                                                                                                         |

SCHOLARONE™  
Manuscripts

only



## 1 ABSTRACT

### 2 3 Introduction

4 Early life experiences influence the physiological and mental health of an individual  
5 through epigenetic modification of DNA. However, little is known about the epigenetic  
6 regulation of genes in infants with adverse birth outcomes, including low birth weight  
7 and preterm birth. To examine the environmental effects on cytosine methylation of  
8 preterm infant's DNA, we compared epigenetic differences in the glucocorticoid  
9 receptor (GR) gene between healthy term and preterm infants.

### 10 11 Methods

12 A cohort of 40 (20 term and 20 preterm) infants was recruited on the day of birth.  
13 Peripheral blood was obtained from each infant at birth and on postnatal day 4. We  
14 calculated the methylation rates in the 1-F promoter region of the GR gene using the  
15 Mquant method.

### 16 17 Results

18 The methylation rate increased significantly between postnatal days 0 and 4 in preterm  
19 infants but remained stable in term infants. Thus, the methylation rate was significantly  
20 higher in preterm than in term infants at postnatal day 4. Several perinatal parameters  
21 were significantly correlated with this change in the methylation rate. **Logistic  
22 regression analysis revealed that methylation rates at postnatal day 4 predicted the  
23 occurrence of later complications that required glucocorticoid administration during the  
24 neonatal period. No gene polymorphism was detected within the GR promoter region  
25 analyzed.**

### 26 27 Conclusion

28 **Although further large-scale studies are needed to detect the environmental factors that  
29 explain the difference in epigenetic modification among infants after birth, our data  
30 show that the postnatal environment influences epigenetic programming of GR  
31 expression through methylation of the GR gene promoter in premature infants, which  
32 may result in relative glucocorticoid insufficiency during the postnatal period.**

33

## 1 Introduction

2 Many human and animal studies have documented the impact of early life experiences  
3 on the neurobiological regulation of stress responsiveness, mood, and anxiety disorders  
4 [1–4]. Maternal care, familial functioning, and childhood adversity all contribute to  
5 neurobiological regulation through epigenetic modification of DNA, which is thought to  
6 be highly stable across a lifespan [5–7]. Hippocampal glucocorticoid receptors (GRs)  
7 play a central role in modulating hypothalamus pituitary adrenal (HPA) axis activity [8–  
8 10]. Exon 1-F of the human GR gene is similar to rat exons 1–7, which is related to a  
9 maternal effect on cytosine methylation and expression [11]. Several human studies  
10 have reported a relationship between early life experience and epigenetic modification  
11 of the GR 1-F promoter region [11–16]. These studies have shown that adverse early  
12 life experiences, such as maternal depression in the third trimester, disruption of  
13 adequate nurturing, and history of childhood abuse, are associated with increased  
14 methylation of the GR promoter in leukocytes [12–15], the hippocampus [11], and the  
15 placenta [16].

16 The stress of birth exceeds that of any other critical life event. Indeed, exposure to  
17 preterm labor and postnatal environmental stress, including the requisite acute care and  
18 prolonged physical separation under neonatal intensive care, may be the most adverse

1 environments during early life. Preterm birth is associated with significant long-term  
2 neurodevelopmental impairments [17-21].

3 Increased methylation of the GR promoter in leukocytes may lead to down regulation of  
4 cell surface GR expression that, in turn, results in glucocorticoid receptor resistance  
5 (GCR). GCR refers to a decrease in the sensitivity of immune cells to glucocorticoid  
6 hormones that normally terminate the inflammatory response [22-24]. Evidence for  
7 GCR in response to prolonged stress has been found in humans, such as families of  
8 patients with cancer or those reporting high levels of loneliness [25-27]. On the other  
9 hand, relative adrenal insufficiency occurs when the HPA axis produces insufficient  
10 cortisol relative to the degree of illness or stress. Several studies have reported a  
11 relative adrenal insufficiency in infants who develop chronic lung disease (CLD)  
12 [28,29] and cardiovascular instability [30-32] including late onset circulatory collapse  
13 (LCC). LCC is thought to be caused by late-onset adrenal insufficiency. An  
14 endocrinological study noted that even though relative glucocorticoid insufficiency in  
15 preterm infants is an underlying factor contributing to LCC, cortisol concentrations did  
16 not differ between the LCC and control infant groups [33,34]. Therefore, another  
17 factor(s), including GCR, may be the cause of LCC.

18 To test the hypothesis that an increase in cytosine methylation within the GR promoter

1 during the perinatal period in preterm infants causes physiological impairment in later  
2 life, we first compared epigenetic differences in the leukocyte GR promoter 1-F region  
3 (containing 33 CpG sites ranging from -3479 bp to -3259 bp upstream of the ATG start  
4 site) between healthy term and preterm infants on day 0 of birth and postnatal day 4.  
5 Furthermore, we examined the relationship between the postnatal change in the  
6 methylation rates and perinatal parameters and whether the methylation status on  
7 postnatal day 4 caused complications in the neonatal period, such as CLD and LCC,  
8 which are thought to be caused by relative adrenal insufficiency.

## 9 10 **Methods**

### 11 12 *Prospective cohort study*

13 Our study was approved by the Juntendo University Urayasu Hospital Research Ethics  
14 Board, and the parents provided informed consent. We recruited a cohort of 40  
15 consecutive infants (20 term and 20 preterm) on the day of birth between April and  
16 October 2012 at our hospital. Eligible term infants were born within 37–41 weeks of  
17 gestation and received routine postnatal care as follows: day 0, skin to skin contact for  
18 30 min from 30 min after birth; day 1, nursing four times (vaginal delivery (VD)) or one

1 time (Caesarean section (C/S)); day 2, rooming with the baby (VD), nursing one time  
2 (C/S); day 3, rooming with the baby (VD), nursing six times (C/S); day 4, discharge  
3 (VD), rooming with the baby (C/S); day 5, rooming with the baby (C/S); day 6,  
4 discharge (C/S)

5 An infant was defined as preterm if born before week 37 of gestation and admitted to  
6 the neonatal intensive care unit (NICU) as premature. Patients born before 37 weeks of  
7 gestation and who did not require admission to the NICU were excluded. All preterm  
8 infants in our study were exposed to maternal separation for at least 4 days after birth.

9 Small for gestational age (SGA) was defined as weight below the 10<sup>th</sup> percentile for  
10 gestational age. The criteria for CLD were the need for additional oxygen after 28 days  
11 of age [35]. The criteria for LCC were (1) sudden systemic hypotension (mean arterial  
12 pressure < 35 mm Hg sustained for at least 3 h); (2) oliguria (< 1 ml kg<sup>-1</sup> h<sup>-1</sup> during an  
13 8-h interval); (3) electrolyte abnormality (hyponatremia < 130 mEqL<sup>-1</sup>, hyperkalemia >  
14 5.5 mEqL<sup>-1</sup>); and (4) excess body weight gain per day (15 gkg<sup>-1</sup> per day or 1.5% per  
15 day). When more than two of these symptoms were detected 7 or more days postnatally,  
16 and after all other common conditions causing systemic hypotension and oliguria, such  
17 as hypovolemia, dehydration, symptomatic patent ductus arteriosus, and sepsis were  
18 ruled out, corticosteroid treatment was started. LCC was diagnosed once the infant

1  
2  
3  
4  
5  
6 1 responded to corticosteroid therapy. Daily changes in body weight, mean arterial  
7  
8  
9 2 pressure, serum sodium and potassium concentrations, and urine output before and at  
10  
11  
12 3 symptom onset were also assessed to help the attending physician make the diagnosis of  
13  
14 4 LCC [34].  
15  
16  
17  
18  
19  
20  
21

#### 22 *Methylation analysis*

23  
24 7 Peripheral blood was obtained from the umbilical cord (day 0) or peripheral vein (day  
25  
26 8 4) from each infant and stored at  $-80^{\circ}\text{C}$  until use. Blood was sampled at day 4 in term  
27  
28  
29 9 infants in conjunction with a metabolic screening test recommended for all infants born  
30  
31  
32 10 in Japan. According to the manufacture's instruction, genomic DNA was extracted from  
33  
34  
35 11 2  $\mu\text{L}$  of frozen peripheral blood and bisulfite treated using an EZ DNA Methylation  
36  
37  
38 12 Direct Kit (Zymo Research Corp., Irvine, CA, USA); 1  $\mu\text{L}$  of the resulting 10  $\mu\text{L}$   
39  
40  
41 13 bisulfite-treated genomic DNA solution was then subjected to polymerase chain  
42  
43  
44 14 reaction (PCR) to amplify the GR promoter 1-F region, as described previously [11].  
45  
46  
47 15 The Mquant method described by Leakey et al. was used to calculate the GR promoter  
48  
49  
50 16 methylation rate [36] (see Supplemental Methods).  
51  
52  
53  
54  
55  
56  
57  
58  
59  
60

#### 18 *Statistical analysis*



1 We performed Wilcoxon's signed-rank test to evaluate the longitudinal difference  
2 between days 0 and 4 after birth in preterm and term group infants. We performed the  
3 Mann-Whitney *U*-test to compare the methylation rates in the preterm and term groups  
4 at each CpG site. We performed the chi-square tests (for gestational age, birth weight,  
5 and Apgar score (at 1 and 5 minutes)), and Mann-Whitney *U*-tests (for intrauterine  
6 growth retardation, Caesarean section delivery, respiratory distress, mechanical  
7 ventilation, intracranial hemorrhage, bacterial infection, and antenatal steroid  
8 administration) to compare the characteristics of each group of infants as shown in  
9 Table 1. Stepwise multiple regression analysis was performed to investigate the  
10 relationships of the increased ratio of methylation rates as a dependent variable, with the  
11 perinatal parameters in preterm infants as independent variables. To perform this  
12 stepwise multiple regression analysis, several nominal variables were converted to  
13 categorical variables by grouping values into two categories. The adjusted coefficient  
14 of determination ( $R^2$ ) is the fraction of information of the dependent variable that is  
15 explained by the independent variables. Logistic regression analysis was performed to  
16 investigate the relationships between the methylation rate at 4 days as a dependent  
17 variable with later complications in the neonatal period as independent variables. The  
18 goodness of fit of the logistic regression models was assessed using Pearson residuals.

1  
2  
3  
4  
5  
6 1 The pseudo-R<sup>2</sup> is the fraction of information of the dependent variable that is explained  
7  
8  
9 2 by the independent variables [37]. We used the likelihood ratio test to test the hypothesis  
10  
11  
12 3 regarding which dependent variable is significantly better among the four CpGs. A *p*-  
13  
14  
15 4 value < 0.05 (two-tailed) was considered significant. All statistical analyses were  
16  
17  
18 5 carried out using the StatView R 5.0J for Windows (SAS Institute, Cary, NC, USA)  
19  
20  
21 6 software package.  
22  
23  
24 7

## 8 **Results**

### 9 10 *Participant characteristics*

11 Thirty-nine of the 40 participants completed the analysis. Bisulfite-treated genomic  
12 DNA from one infant from the preterm group could not be amplified by PCR for  
13 unknown reasons. The characteristics of the infants are shown in Table 1. Ten of 19  
14 preterm infants received antenatal steroids. The preterm infants had higher rates of  
15 intrauterine growth retardation than that of infants delivered by Caesarean section.  
16 They had lower Apgar scores at 1 min and 5 min compared with those of term infants.  
17 Preterm infants displayed higher rates of respiratory distress and required mechanical  
18 ventilation more frequently during the postnatal period than did term infants. None of

1 the infants experienced a bacterial infection or intracranial hemorrhage through  
2 postnatal day 4. No gene polymorphism was detected within the GR promoter region  
3 analyzed.

#### 4 *Longitudinal changes in methylation status*

5 We examined 33 CpG sites in the GR 1-F promoter. In preterm infants, methylation  
6 rates significantly increased between birth and postnatal day 4 at 11 CpG sites (1,  $p =$   
7 0.022; 2,  $p = 0.044$ ; 8,  $p = 0.00029$ ; 9,  $p = 0.049$ ; 10,  $p = 0.044$ ; 14,  $p = 0.0013$ ; 16,  $p =$   
8 0.0022; 25,  $p = 0.036$ ; 26,  $p = 0.049$ ; 28,  $p = 0.00097$ ; 29,  $p = 0.016$ ) and significantly  
9 decreased at one CpG site (4,  $p = 0.030$ ). In contrast, methylation rates between birth  
10 and postnatal day 4 were stable in term infants (Figure 1).

#### 11 *Cross-sectional differences in methylation status*

12 Methylation rates in preterm infants at birth were lower at three CpG sites (1;  $p = 0.033$ ,  
13 5;  $p = 0.0024$ , 8;  $p = 0.0001$ ) and higher at one site (4;  $p = 0.040$ ) compared with those  
14 in term infants. Methylation rates on postnatal day 4 were significantly higher in  
15 preterm infants compared with term infants at seven CpG sites (15,  $p = 0.00061$ ; 16,  $p =$   
16 0.0083; 21,  $p = 0.043$ ; 25,  $p = 0.0098$ ; 26,  $p = 0.0050$ ; 27,  $p = 0.00040$ ; 28,  $p = 0.038$ ).

1 Methylation rates in preterm infants were not lower than those of term infants at any  
2 CpG site (Figure 2).

3 Figure 3 shows the changes in methylation status in each group between birth and  
4 postnatal day 4 at CpG sites 16, 25, 26, and 28. Methylation rates at these sites  
5 significantly increased only in preterm infants, resulting in a significantly higher  
6 methylation rate in preterm than in term infants on postnatal day 4.

#### 7 8 *Relationship between methylation rates at birth and perinatal parameters*

9 We analyzed the relationship between the methylation rates at birth at CpG sites 1, 4, 5,  
10 and 8 and prenatal parameters such as gestational age, birth weight, SGA, antenatal  
11 steroid administration, and mode of delivery. We found no significant correlation among  
12 them.

#### 13 14 *Relationship between the increase in the methylation rate ratio and perinatal 15 parameters*

16 To examine the relationship between the increased methylation rate ratio and perinatal  
17 parameters, we chose 12 CpG sites (1, 2, 4, 8, 9, 10, 14, 16, 25, 26, 28, and 29) in which  
18 the methylation rates were significantly increased (with the exception of CpG4), and

1  
2  
3  
4  
5  
6 1 calculated the ratio as the methylation rate at day 4 divided by that at day 0. Then we  
7  
8  
9 2 investigated the relationship between the change in ratio at each CpG site and the  
10  
11  
12 3 perinatal parameters of gestational age, birth weight, Apgar score, mode of delivery,  
13  
14  
15 4 SGA, respiratory distress syndrome (RDS), mechanical ventilation, antenatal steroid  
16  
17  
18 5 administration, and admission to the NICU. We found associations between these  
19  
20  
21 6 parameters and an increase in the methylation rate ratio at CpG4, CpG8, CpG10,  
22  
23  
24 7 CpG25, and CpG29. The change in methylation ratio at each CpG site was associated  
25  
26  
27 8 with following perinatal parameters in the parenthesis: CpG4 (gestational age and Apgar  
28  
29  
30 9 score at 1 min [regression coefficient = 0.029 and -0.085, respectively; overall  $p$ -value =  
31  
32  
33 10 0.004; adjusted- $R^2$  = 0.223]); CpG8 (SGA, Caesarean section, Apgar score at 5 min, and  
34  
35  
36 11 NICU admission [regression coefficient = 0.43, -0.31, 0.16, and 0.79, respectively;  
37  
38  
39 12 overall  $p$ -value < 0.0001; adjusted- $R^2$  = 0.573]); CpG10 (NICU admission [regression  
40  
41  
42 13 coefficient = 0.29; overall  $p$ -value = 0.037; adjusted- $R^2$  = 0.089]); CpG25 (SGA  
43  
44  
45 14 [regression coefficient = 0.86, overall  $p$ -value = 0.009, adjusted- $R^2$  = 0.15]); and CpG29  
46  
47  
48 15 (SGA [regression coefficient = 0.096, overall  $p$ -value = 0.039, adjusted- $R^2$  = 0.086]),  
49  
50  
51 16 respectively.

52  
53  
54  
55  
56  
57  
58  
59  
60

18 *Relationship between methylation rate at postnatal day 4 and complications during the*

1 *neonatal period*

2 We chose four CpG sites (16, 25, 26, and 28) shown in Figure 3 to investigate the  
3 relationship between methylation status on postnatal day 4 and complications during the  
4 perinatal period. Then, we analyzed the relationship between the methylation rate at  
5 these CpG sites on postnatal day 4 and subsequent complications. **There were four**  
6 **preterm infants who had some complications and needed glucocorticoid administration**  
7 **during the neonatal period. (CLD; n=3, LCC; n=3) Except for these four cases, no**  
8 **infant received glucocorticoid therapy postnatally.**

9 The logistic regression models were statistically fit (Pearson residuals,  $\chi^2 = 19.284$ ,  $p =$   
10  $0.9799$ , pseudo- $R^2 = 0.429$ ). CpG16 had a significantly better explanatory factor among  
11 four CpGs (likelihood ratio test  $\chi^2 = 3.889$ ,  $p = 0.0486$ ).

### 13 **Discussion**

14 Our study is the first longitudinal analysis of GR promoter methylation in humans  
15 during the perinatal period, the stage that is thought to be the most susceptible to  
16 epigenetic regulation. The present study demonstrated that postnatal exposure to an  
17 adverse environment in preterm infants influences epigenetic programming of the  
18 glucocorticoid response via GR promoter methylation during the neonatal period.

1 We found that perinatal parameters such as gestational age, intrauterine growth, Apgar  
2 score, and mode of delivery were predictors for changes in methylation rates at CpG  
3 sites in the GR promoter as well as NICU admission.

4 It should be noted that gestational age was positively associated with an increase in the  
5 methylation ratio at CpG4. Exposure to preterm labor may be an adverse environment  
6 in early life. Therefore, the methylation rate ratio at CpG4 should be negatively  
7 associated with gestational age. CpG4 was the only site at which the methylation rates  
8 in preterm infants were significantly higher than those in term infants at birth.

9 Moreover, CpG4 was the only site at which the methylation rate was lower on postnatal  
10 day 4 than on day 0. Taken together, the change in methylation at CpG4 seemed to be  
11 regulated inversely, compared with other CpG sites. The mechanisms underlying DNA  
12 methylation and demethylation probably develop due to unfavorable experiences during  
13 early life; however, recent studies that have investigated other transcripts of the GR  
14 gene have proposed a more complex child maltreatment-induced DNA methylation  
15 model than previously described for exon 1-F [38]. In the present study, CpG4 may be a  
16 transcriptionally silent methylation site that mediated aberrant epigenetic regulation, as  
17 proposed by Lutz et al [38]. Low Apgar score, which is thought to be an unfavorable  
18 experience during the perinatal period, is positively associated with the CpG4

1  
2  
3  
4  
5  
6 1 methylation ratio increase and negatively associated with that of CpG8. Thus, low  
7  
8  
9 2 Apgar score may have a negative effect on methylation in most CpG sites in the GR 1-F  
10  
11  
12 3 promoter. One possible explanation is that low Apgar score indicates an adverse  
13  
14  
15 4 condition of cardiopulmonary function, which, in turn, inactivates the enzymatic  
16  
17  
18 5 cascade for DNA methylation. Stable oxygen and energy supplements may be necessary  
19  
20  
21 6 to open the window for epigenetic programming by DNA methylation. Caesarean  
22  
23  
24 7 section delivery was negatively associated with an increase in the methylation ratio at  
25  
26  
27 8 CpG8. This obstetrical intervention may partially reduce stress-induced epigenetic  
28  
29  
30 9 programming of the GR promoter. SGA was positively associated with an increase in  
31  
32  
33 10 methylation rate ratio at CpG8, 25, and 29. The intrauterine environment, like the  
34  
35  
36 11 postnatal environment, can affect fetal epigenetic modification of DNA. SGA infants  
37  
38  
39 12 have been thought to demonstrate epigenomic dysregulation, which mediates the long-  
40  
41  
42 13 term consequences of intrauterine growth restriction at birth [39,40]. The present study  
43  
44  
45 14 showed that, in the GR gene, SGA might influence the infant's susceptibility to the  
46  
47  
48 15 postnatal environment rather than epigenomic dysregulation at birth. As we expected,  
49  
50  
51 16 NICU admission followed by maternal separation was positively associated with an  
52  
53  
54 17 increase in the methylation rate ratio at CpG8 and 10. Taken together, we could  
55  
56  
57 18 approximately estimate the relationship between perinatal parameters and changes in  
58  
59  
60



1 methylation rates at CpG sites in the GR promoter. Further precise analysis should give  
2 insights into the host-environment interaction.

3 **Four preterm infants needed glucocorticoid administration during the postnatal period**

4 **due to CLD or LCC.** The logistic regression models were statistically fit to predict the

5 development of these complications (CLD and LCC), which were thought to be partly

6 related to relative adrenal insufficiency. CpG16 had a significantly better explanatory

7 factor among the four CpGs in which methylation rates increased significantly only in

8 preterm infants resulting in a significantly higher methylation rate in preterm than in

9 term infants on postnatal day 4. CpG16 is a binding site for nerve growth factor

10 inducible protein A (NGFI-A), which has emerged as a central regulator of early

11 inflammatory and immune processes and potentiates GR 1-F promoter activity [11,41-

12 43].

13 Taken together, our results suggest that the high methylation rate observed in leukocyte

14 GR promoters may result in GR unresponsiveness to early inflammatory stimuli by

15 NGFI-A, followed by GCR and/or a failure to downregulate inflammatory responses by

16 glucocorticoids [44].

17 **One limitation of our study was the small sample size. Further studies with larger**

18 **sample sizes that include patients with chronic inflammation are needed.**

1

**2 Conclusions**

3 We found marked changes in DNA methylation induced by the postnatal environment

4 during the 4 days immediately after birth. Moreover, the methylation status at postnatal

5 day 4 may predict the development of complications during the neonatal period, which

6 is thought to be induced by relative glucocorticoid insufficiency in preterm infants.

7

8

9

10

11

12

13

14

15

16

17

18

|                                             | <b>Preterm<br/>(n=19)</b> | <b>Term<br/>(n=20)</b> | <b><i>p</i> value<br/>(preterm<br/>vs term)</b> |
|---------------------------------------------|---------------------------|------------------------|-------------------------------------------------|
| <b>Gestational age (weeks) (Mean ± SD)</b>  | <b>30.8 ± 3.2</b>         | <b>39.8 ± 1.3</b>      | <b>&lt;0.001</b>                                |
| <b>Birth weight (g) (Mean ± SD)</b>         | <b>1431 ± 605</b>         | <b>3076 ± 271</b>      | <b>&lt;0.001</b>                                |
| <b>Intrauterine growth retardation (n)</b>  | <b>7</b>                  | <b>1</b>               | <b>0.014</b>                                    |
| <b>Caesarean section delivery (n)</b>       | <b>15</b>                 | <b>3</b>               | <b>&lt;0.001</b>                                |
| <b>Apgar score at 1 min (Mean ± SD)</b>     | <b>6.3 ± 2.6</b>          | <b>9 ± 0</b>           | <b>&lt;0.001</b>                                |
| <b>Apgar score at 5 min (Mean ± SD)</b>     | <b>8.4 ± 1.2</b>          | <b>10 ± 0</b>          | <b>&lt;0.001</b>                                |
| <b>Respiratory distress (n)</b>             | <b>10</b>                 | <b>0</b>               | <b>&lt;0.001</b>                                |
| <b>Mechanical ventilation (n)</b>           | <b>10</b>                 | <b>0</b>               | <b>&lt;0.001</b>                                |
| <b>Intracranial hemorrhage (n)</b>          | <b>0</b>                  | <b>0</b>               | <b>1</b>                                        |
| <b>Bacterial infection (n)</b>              | <b>0</b>                  | <b>0</b>               | <b>1</b>                                        |
| <b>Antenatal steroid administration (n)</b> | <b>10</b>                 | <b>0</b>               | <b>&lt;0.001</b>                                |

**Table 1; Participant characteristics**

1  
2  
3  
4  
5  
6 **1 What's Known on This Subject:**  
7

8  
9 2 Early life experiences influence the physiological and mental health of an individual  
10  
11 3 through epigenetic modification of DNA, which is thought to be highly stable across the  
12  
13 4 lifespan.  
14  
15

16  
17  
18 **5 What This Study Adds:**  
19

20  
21 6 Postnatal environment resets the epigenetic modification of glucocorticoid receptor  
22  
23 7 gene promoter during four days after birth in preterm infants.  
24  
25

26  
27  
28  
29 **9 Acknowledgements**  
30

31  
32 10 We thank Dr. Satoru Yamaguchi for sample collection.  
33

34  
35 11 The English in this document has been checked by at least two professional editors,  
36  
37 12 both native speakers of English. For a certificate, please see:

38  
39  
40 13 <http://www.textcheck.com/certificate/dN67>  
41  
42

43  
44  
45  
46 **15 Competing interests**  
47

48  
49 16 Financial Disclosure: The authors have no financial relationships relevant to this article  
50  
51 17 to disclose.  
52

53  
54  
55 18 Conflict of Interest: The authors have no conflict of interest to disclose.  
56  
57

1

2 **Funding**

3 This work was supported in part by Grants-in-Aid for General Scientific Research, Nos.  
4 24659511 (M.K.), 23390389 (Y.A.) and “High-Tech Research Center” Project for  
5 Private Universities: matching fund subsidy from the Ministry of Education, Culture,  
6 Sports, Science, and Technology, Japan.

7

8 **Contributors**

9 Drs. Kantake and Shimizu conceptualized and designed the study.  
10 Dr. Kantake carried out the initial analyses and drafted the initial manuscript.  
11 Dr. Araki reviewed and revised the manuscript.  
12 Dr. Yoshitake designed the data collection instruments, and coordinated and supervised  
13 data collection.  
14 Dr. Ishikawa performed statistical analysis and revised the manuscript.  
15 Drs. Kantake, Yoshitake, Ishikawa, Araki and Shimizu approved the final manuscript as  
16 submitted.

17

1  
2  
3  
4  
5  
6 **1 References**  
7  
8

9  
10 **2**

11  
12 1. Kaufman J, Charney D. Effects of early stress on brain structure and function:  
13

14 Implications for understanding the relationship between child maltreatment and  
15

16 depression. *Dev Psychopathol* 2001;**13**:451.  
17

18  
19  
20 2. Kessler RC, Davis CG, Kendler KS. Childhood adversity and adult psychiatric  
21

22 disorder in the US National Comorbidity Survey. *Psychol Med* 1997;**27**:1101-1119.  
23

24  
25 3. Schilling EA, Aseltine RHJr, Gore S. Adverse childhood experiences and mental  
26

27 health in young adults: a longitudinal survey. *BMC Public Health* 2007;**7**:30.  
28

29  
30 4. De Kloet ER, Joels M, Holsboer F. Stress and brain: from adaptation to disease. *Nat.*  
31

32  
33 *Rev. Neurosci.* 2005;**6**:463-475.  
34

35  
36 5. De Bellis MD, Chrousos GP, Dorn LD, et al. Hypothalamic-pituitary-adrenal axis  
37

38 dysregulation in sexually abused girls. *J Clin Endocrinol Metab* 1994;**78**:249-255.  
39

40  
41 6. Weaver ICG. Epigenetic programming by maternal behavior and pharmacological  
42

43 intervention. Nature versus nurture: let's call the whole thing off. *Epigenetics*  
44

45  
46 2007;**2**: 22-28.  
47

48  
49 7. Champagne FA, Curley JP. Epigenetic mechanisms mediating the long-term effects  
50

51  
52 of maternal care on development. *Neurosci Biobehav Rev* 2009;**33**:593-600.  
53  
54  
55  
56  
57  
58  
59  
60

- 1  
2  
3  
4  
5  
6 1 8. Liu D, Diorio J, Tannenbaum B, et al. Maternal care, hippocampal glucocorticoid  
7  
8  
9 2 receptors, and hypothalamic-pituitary-adrenal responses to stress. *Science*  
10  
11 3 1997;**277**:1659-62.  
12  
13  
14 4 9. Weaver ICG, Cervoni N, Champagne FA, et al. Epigenetic programming by  
15  
16 5 maternal behavior. *Nat Neurosc.* 2004;**7**:847-854.  
17  
18  
19  
20 6 10. Boyle MP, Brewer JA, Funatsu M, et al. Acquired deficit of forebrain glucocorticoid  
21  
22 7 receptor produces depression-like changes in adrenal axis regulation and behavior.  
23  
24 8 *Proc Natl Acad Sci USA* 2005;**102**:473-478.  
25  
26  
27  
28 9 11. McGowan PO, Sasaki A, D'Alessio AC, et al. Epigenetic regulation of the  
29  
30 10 glucocorticoid receptor in human brain associates with childhood abuse. *Nat*  
31  
32 11 *Neurosci* 2009;**12**:342-348.  
33  
34  
35  
36 12 12. Oberlander TF, Weinberg J, Papsdorf M, et al. Prenatal exposure to maternal  
37  
38 13 depression, neonatal methylation of human glucocorticoid receptor gene (*NR3C1*)  
39  
40 14 and infant cortisol stress responses. *Epigenetics* 2008;**3**:97-106.  
41  
42  
43  
44 15 13. Tyrka AR, Price LH, Marsit C, et al. Childhood adversity and epigenetic modulation  
45  
46 16 of the leukocyte glucocorticoid receptor: preliminary findings in healthy adults.  
47  
48 17 *PloS ONE* 2012;**7**:e30148.  
49  
50  
51  
52 18 14. Perroud N, Paoloni-Giacobino A, Prada P, et al. Increased methylation of  
53  
54  
55  
56  
57  
58  
59  
60

- 1  
2  
3  
4  
5  
6 1 glucocorticoid receptor gene (NR3C1) in adults with a history of childhood  
7  
8  
9 2 maltreatment: a link with the severity and type of trauma. *Transl Psychiatry*  
10  
11  
12 3 2011;**1**:e59.
- 14 4 15. Mulligan CJ, D'Errico NC, Stees J, et al. Methylation changes at NR3C1 in  
16  
17  
18 5 newborns associate with maternal prenatal stress exposure and newborn birth weight.  
19  
20  
21 6 *Epigenetics* 2012; **7**:853-857.
- 23 7 16. Bromer C, Marsit CJ, Armstrong DA, et al. Genetic and epigenetic variation of the  
24  
25  
26 8 glucocorticoid receptor (NR3C1) in placenta and infant neurobehavior. *Dev*  
27  
28  
29 9 *Psychobiol* 2013;**55**:673-83.
- 31  
32 10 17. Hack M, Flannery DJ, Schluchter M, et al. Outcomes in young adulthood for very-  
33  
34  
35 11 low-birth-weight infants. *N Engl J Med* 2002;**346**:149-157.
- 37  
38 12 18. Marlow N. Neurocognitive outcome after very preterm birth. *Arch Dis Child Fetal*  
39  
40  
41 13 *Neonatal Ed* 2004;**89**: F224-228.
- 43  
44 14 19. Aylward GP. Cognitive and neuropsychological outcomes: more than IQ scores.  
45  
46  
47 15 *Ment Retard Dev Disabil Res Rev* 2002;**8**:234-240.
- 49  
50 16 20. Larroque B, Ancel PY, Marret S, et al. ; EPIPAGE Study Group.  
51  
52  
53 17 Neurodevelopmental disabilities and special care of 5-year-old children born before  
54  
55  
56 18 33 weeks of gestation (the EPIPAGE study): a longitudinal cohort study. *Lancet*



- 1 2008;**371**:813-820.
- 2 21. Hack M. Adult outcomes of preterm children. *J Dev Behav Pediatr* 2009;**30**:460-70.
- 3 22. Marques AH, Silverman MN, Sternberg EM. Glucocorticoid dysregulation and their  
4 clinical correlates. From receptors to therapeutics. *Ann NY Acad Sci* 2009;**1179**:1-  
5 18.
- 6 23. Stark JL, Avitsur R, Padgett DA, et al. Social stress induces glucocorticoid  
7 resistance in macrophages. *Am J Physiol* 2001;**280**:1799-1805.
- 8 24. Silverman MN, Sternberg EM. Glucocorticoid regulation of inflammation and its  
9 functional correlates: from HPA axis to glucocorticoid receptor dysfunction. *Ann NY*  
10 *Acad Sci* 2012;**1261**:55-63.
- 11 25. Cole SW. Social regulation of leukocyte homeostasis: The role of glucocorticoid  
12 sensitivity. *Brain Behav Immun* 2008;**22**:1049-1055.
- 13 26. Miller GE, Cohen S, Ritchey AK. Chronic psychological stress and the regulation of  
14 pro-inflammatory cytokines: A glucocorticoid-resistance model. *Health Psychol*  
15 2002;**21**:531-541.
- 16 27. Miller GE, Chen E, Sze J, et al. A functional genomic fingerprint of chronic stress in  
17 humans: blunted glucocorticoid and increased NF-kappaB signaling. *Biol Psychiatry*  
18 2008;**64**:266-272.

- 1  
2  
3  
4  
5  
6 1 28. Watterberg KL, Scott SM. Evidence of early adrenal insufficiency in babies who  
7  
8  
9 2 develop bronchopulmonary dysplasia. *Pediatrics* 1995;**95**:120-125.  
10  
11  
12 3 29. Watterberg KL, Gerdes JS, Cole CH, et al. Prophylaxis of early adrenal  
13  
14 4 insufficiency to prevent bronchopulmonary dysplasia: a multicenter trial. *Pediatrics*  
15  
16 5 2004;**114**:1649-1657.  
17  
18  
19  
20 6 30. Ng PC, Lam CW, Fok TF, et al. Refractory hypotension in preterm infants with  
21  
22 7 adrenocortical insufficiency. *Arch Dis Child Fetal Neonatal Ed* 2001;**84**:F122-F124.  
23  
24  
25 8 31. Arnold JD, Bonacruz G, Leslie GI, et al. Antenatal glucocorticoids modulate the  
26  
27 9 amplitude of pulsatile cortisol secretion in premature neonates. *Pediatr Res*  
28  
29 10 1998;**44**:876-881.  
30  
31  
32  
33  
34 11 32. Yoder B, Martin H, McCurnin DC, et al. Impaired urinary cortisol excretion and  
35  
36 12 early cardiopulmonary dysfunction in immature baboon. *Pediatr Res* 2002;**51**:426-  
37  
38 13 432.  
39  
40  
41  
42  
43 14 33. Matsumoto K, Kusuda S, Aoyagi H, et al. Comparison of serum cortisol  
44  
45 15 concentrations in preterm infants with or without late-onset circulatory collapse due  
46  
47 16 to adrenal insufficiency of prematurity. *Pediatr Res* 2008;**63**:686-690.  
48  
49  
50  
51  
52 17 34. Nakanishi H, Yamanaka S, Koriyama T, et al. Clinical characterization and long-  
53  
54 18 term prognosis of neurological development in preterm infants with late-onset-  
55  
56  
57  
58  
59  
60

- 1            **circulatory collapse. *J perinatol* 2010;**30**:751-756.**
- 2            35. Jobe AH, Bancalari E. Bronchopulmonary dysplasia. *Am J Respir Crit Care Med*
- 3            2001;**163**:1723-9.
- 4            36. Leakey TI, Zielinski J, Siegfried RN, et al. A simple algorithm for quantifying DNA
- 5            methylation levels on multiple independent CpG sites in bisulfite genomic
- 6            sequencing electropherograms. *Nucleic Acids Res* 2008;**36**:e64.
- 7            37. Cameron AC, Windmeijer FAG. An R-squared measured of goodness of fit for some
- 8            common nonlinear regression models. *Journal of Econometrics* 1997;**77**:329-342.
- 9            38. Lutz PE, Turecki G. DNA methylation and childhood maltreatment: from animal
- 10           models to human studies. *Neuroscience* 2013;**7**:in press.
- 11           39. Godfrey KM, Lillycrop KA, Burdge GC, et al. Epigenetic mechanisms and the
- 12           mismatch concept of the developmental origins of health and disease. *Pediatric*
- 13           *Research* 2007; **61**:5R-10R.
- 14           40. Einstein F, Thompson RF, Bhagat TD, et al. Cytosine methylation dysregulation in
- 15           neonates following intrauterine growth restriction. *PLoS One* 2010;**5**:e8887.
- 16           41. Weaver ICG, D'Alessio AC, Brown SE, et al. The transcription factor nerve growth
- 17           factor - inducible protein A mediates epigenetic programming: altering epigenetic
- 18           marks by immediate - early genes. *J Neurosci* 2007;**27**:1756-1768.

- 1  
2  
3  
4  
5  
6 1 42. Cullen EM, Brazil JC, O'Connor CM. Mature human neutrophils constitutively  
7  
8  
9 2 express the transcription factor EGR-1. *Mol Immunol* 2010;**47**:1701-9.  
10  
11  
12 3 43. Seiler MP, Mathew R, Liszewski MK, et al. Elevated and sustained expression of  
13  
14 4 the transcription factors Egr1 and Egr2 controls NKT lineage differentiation in  
15  
16 5 response to TCR signaling. *Nature Immunol* 2012;**13**:264-271.  
17  
18  
19  
20  
21 6 44. Cohen S, Janicki-Deverts D, Doyle WJ, et al. Chronic stress, glucocorticoid receptor  
22  
23 7 resistance, inflammation, and disease risk. *Proc Natl Acad Sci USA* 2012;**109**:5995-  
24  
25 8 5999.  
26  
27  
28  
29

### 30 **Figure Legends**

31  
32  
33 12 Figure 1. Longitudinal analysis of the methylation rate of the glucocorticoid receptor  
34 13 (GR) gene promoter in the leukocyte calculated using the Mquant method.  
35 14 The percentage of methylation at each CpG site (mean  $\pm$  SEM) in the GR promoter  
36 15 isolated in peripheral blood collected from term and preterm infants at birth (dark gray  
37 16 bar) and postnatal day 4 (light gray bar), respectively. Wilcoxon's signed-rank test was  
38 17 performed to compare the methylation rate on day 0 and day 4 at each CpG site. A *p*-  
39 18 value <0.05 (two tailed) was considered statistically significant.  
40 19 Closed star symbol, significant increase in methylation rate; Open star symbol,  
41 20 significant decrease in methylation rate. No significant changes in methylation rate  
42 21 between postnatal days 0 and 4 were observed in term infants.  
43  
44  
45  
46  
47  
48

49 23 Figure 2. Cross-sectional analysis of the methylation rates of the glucocorticoid receptor  
50 24 (GR) gene promoter in leukocytes determined using the Mquant method  
51 25 Percentage of methylation at each CpG site (mean  $\pm$  SEM) in the GR promoter isolated  
52 26 from peripheral blood collected at birth and on postnatal day 4 in term (dark gray bar)  
53 27 and preterm (light gray bar) infants, respectively. Mann-Whitney *U*-tests were  
54 28 performed to compare the methylation rates in preterm and term infants at each CpG  
55  
56  
57  
58  
59  
60

1 site. A  $p$ -value  $<0.05$  (two tailed) was considered statistically significant.

2 Closed star symbol, methylation rate significantly higher in preterm compared to term  
3 infants; Open star symbol, methylation rate significantly lower in preterm compared to  
4 term infants.

5  
6 Figure 3. Change in methylation status between birth and postnatal day 4 at CpG sites  
7 16, 25, 26, and 28. Methylation rates at these sites were significantly greater in preterm  
8 than in term infants resulting in a significantly higher methylation rate ratio in the  
9 preterm infants on postnatal day 4. The day 0 and day 4 methylation rate ratios were  
10 compared using Wilcoxon's signed-rank test. The Mann–Whitney  $U$ -test was performed  
11 to compare the methylation rates in preterm infants with those in term infants.

12 ns, not significant.

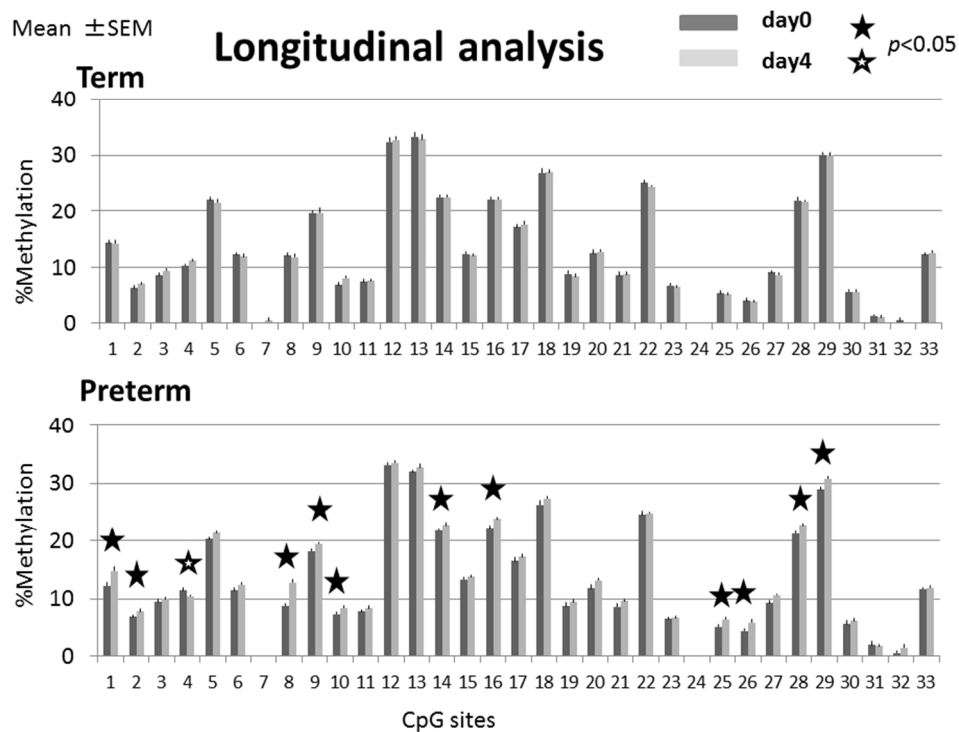

Figure 1. Longitudinal analysis of the methylation rate of the glucocorticoid receptor (GR) gene promoter in the leukocyte calculated using the Mquant method.

The percentage of methylation at each CpG site (mean  $\pm$  SEM) in the GR promoter isolated in peripheral blood collected from term and preterm infants at birth (dark gray bar) and postnatal day 4 (light gray bar), respectively. Wilcoxon's signed-rank test was performed to compare the methylation rate on day 0 and day 4 at each CpG site. A p-value  $< 0.05$  (two tailed) was considered statistically significant.

Closed star symbol, significant increase in methylation rate; Open star symbol, significant decrease in methylation rate. No significant changes in methylation rate between postnatal days 0 and 4 were observed in term infants.

254x190mm (96 x 96 DPI)

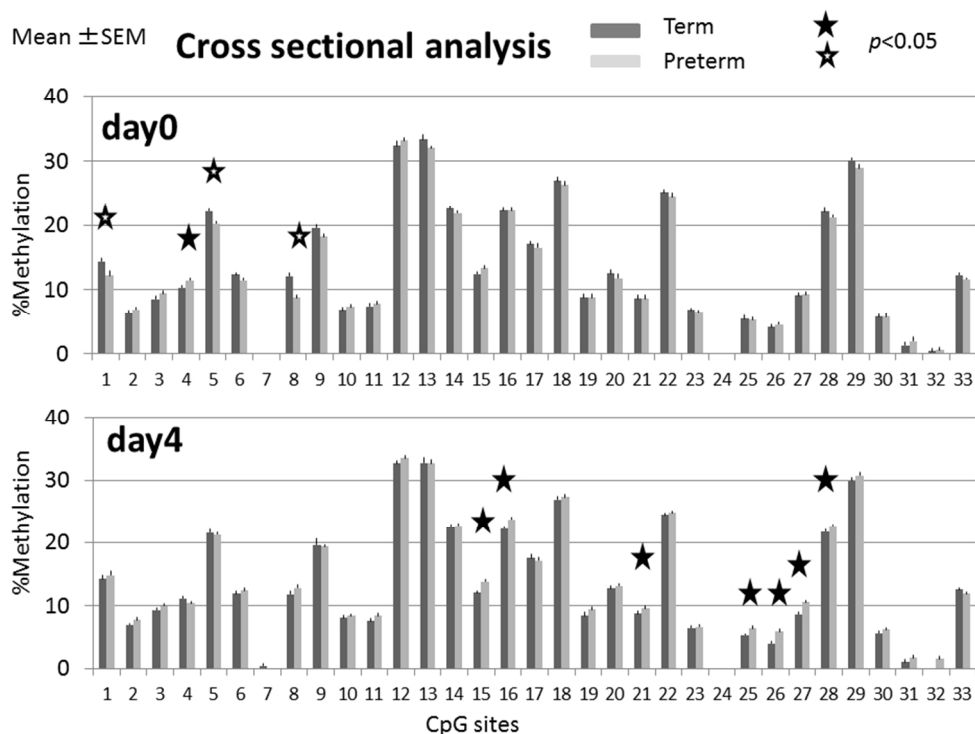

Figure 2. Cross-sectional analysis of the methylation rates of the glucocorticoid receptor (GR) gene promoter in leukocytes determined using the Mquant method

Percentage of methylation at each CpG site (mean  $\pm$  SEM) in the GR promoter isolated from peripheral blood collected at birth and on postnatal day 4 in term (dark gray bar) and preterm (light gray bar) infants, respectively. Mann-Whitney U-tests were performed to compare the methylation rates in preterm and term infants at each CpG site. A p-value  $< 0.05$  (two tailed) was considered statistically significant.

Closed star symbol, methylation rate significantly higher in preterm compared to term infants; Open star symbol, methylation rate significantly lower in preterm compared to term infants.

254x190mm (96 x 96 DPI)

only

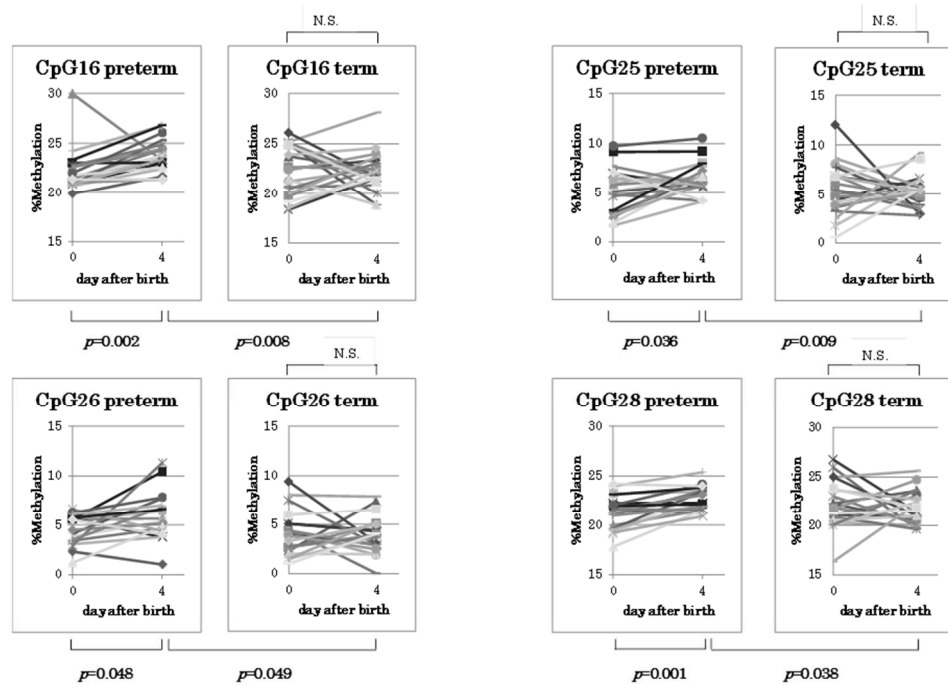

Figure 3. Change in methylation status between birth and postnatal day 4 at CpG sites 16, 25, 26, and 28. Methylation rates at these sites were significantly greater in preterm than in term infants resulting in a significantly higher methylation rate ratio in the preterm infants on postnatal day 4. The day 0 and day 4 methylation rate ratios were compared using Wilcoxon's signed-rank test. The Mann-Whitney U-test was performed to compare the methylation rates in preterm infants with those in term infants. ns, not significant.

254x190mm (96 x 96 DPI)



## Supplemental methods

Primers for PCR were directed against the GR 1-F promoter using the following sequences: sense, 5'- GTG GTG GGG GAT TTG -3'; antisense, 5'- ACC TAA TCT CTC TAA AAC -3'. PCR was performed using a TaKaRa EpiTaq HS DNA polymerase kit (TAKARA BIO Inc., Shiga, Japan). Each 20  $\mu$ L PCR reaction included 1 U Taq polymerase, 0.25 mM dNTP mix, 1.25 mM  $MgCl_2$ , and 1  $\mu$ M each primer. The thermocycler protocol consisted of the following procedure: initial denaturation (5 min, 95°C); 35 cycles of denaturation (1 min, 95°C), annealing (2 min 30 s, 50°C), and extension (1 min, 72°C); and then a final extension (5 min, 72°C) with subsequent cooling to 20°C. The resulting product was separated by 2% agarose gel electrophoresis, and the corresponding 436 bp band was excised and purified using a Min Elute Gel Extraction Kit (QIAGEN N.V. Venlo, Netherlands). The purified product was amplified by nested PCR, using the following primers: sense, 5'- TTT TTG AAG TTT TTT TAG AGG G- 3'; antisense, 5'- AAT TTC TCC AAT TTC TTT TCT C- 3'. The PCR conditions were identical to the initial PCR procedure, with the exception that the annealing temperature was 54.2°C and 3 ng initial PCR product was used as template DNA. Then the product was purified using the same procedure as that used for the initial PCR (the corresponding band was 311 bp), and 20 ng of the resulting product was

1  
2  
3  
4  
5  
6 subjected to direct sequencing (Operon Biotechnology Co., Ltd. Tokyo, Japan) using  
7  
8  
9 antisense 'nested' primer. The ABL files from sequencing were processed using BioEdit  
10  
11  
12 (<http://www.mbio.ncsu.edu/BioEdit/bioedit.html>).

13  
14  
15 To calculate the GR promoter methylation rate, the Mquant method described by  
16  
17  
18 Leakey et al. was used. First, the mean T height (T bar) from an equal number of each  
19  
20  
21 side surrounding the target CpG site was determined in conventional four-dye-trace  
22  
23  
24 direct sequencing electrophoregrams of this PCR product. We used 10 Ts (5 Ts from  
25  
26  
27 each side) around the CpG site. Ts used to calculate the T bar should be at least 10 times  
28  
29  
30 the height of their secondary base (C, G, or A). Second, the height of the T at the target  
31  
32  
33 CpG site was subtracted from T bar to yield delta T. Third, the level of methylation on  
34  
35  
36 the site was calculated as a ratio ( $\Delta T/T$  bar). The calculations were performed  
37  
38  
39 using Excel 2013 (Microsoft, Redmond, WA, USA).  
40  
41  
42  
43  
44  
45  
46  
47  
48  
49  
50  
51  
52  
53  
54  
55  
56  
57  
58  
59  
60

# BMJ Open

## Postnatal epigenetic modification of glucocorticoid receptor gene in preterm infants: a prospective cohort study

|                                 |                                                                                                                                                                                                                                                                                                                                                                                                                                                                                                                                         |
|---------------------------------|-----------------------------------------------------------------------------------------------------------------------------------------------------------------------------------------------------------------------------------------------------------------------------------------------------------------------------------------------------------------------------------------------------------------------------------------------------------------------------------------------------------------------------------------|
| Journal:                        | <i>BMJ Open</i>                                                                                                                                                                                                                                                                                                                                                                                                                                                                                                                         |
| Manuscript ID:                  | bmjopen-2014-005318.R1                                                                                                                                                                                                                                                                                                                                                                                                                                                                                                                  |
| Article Type:                   | Research                                                                                                                                                                                                                                                                                                                                                                                                                                                                                                                                |
| Date Submitted by the Author:   | 05-Jun-2014                                                                                                                                                                                                                                                                                                                                                                                                                                                                                                                             |
| Complete List of Authors:       | Kantake, Masato; Juntendo University Urayasu Hospital, Perinatal Medical Center<br>Yoshitake, Hiroshi; Juntendo University Graduate School of Medicine, Institute for Environmental & Gender-specific Medicine<br>Ishikawa, Hitoshi; Yamagata Saisei Hospital, Department of Health Information Management<br>Araki, Yoshihiko; Juntendo University Graduate School of Medicine, Institute for Environmental & Gender-specific Medicine<br>Shimizu, Toshiaki; Juntendo University Graduate School of Medicine, Department of Pediatrics |
| <b>Primary Subject Heading</b>: | Paediatrics                                                                                                                                                                                                                                                                                                                                                                                                                                                                                                                             |
| Secondary Subject Heading:      | Immunology (including allergy)                                                                                                                                                                                                                                                                                                                                                                                                                                                                                                          |
| Keywords:                       | NEONATOLOGY, MOLECULAR BIOLOGY, Paediatric endocrinology < PAEDIATRICS                                                                                                                                                                                                                                                                                                                                                                                                                                                                  |
|                                 |                                                                                                                                                                                                                                                                                                                                                                                                                                                                                                                                         |

SCHOLARONE™  
Manuscripts

only

1  
2  
3  
4  
5 **Postnatal epigenetic modification of glucocorticoid receptor gene in preterm**  
6 **infants: a prospective cohort study**  
7  
8

9  
10 Masato Kantake<sup>1</sup>, MD, Hiroshi Yoshitake<sup>2</sup>, MD, Hitoshi Ishikawa<sup>3</sup>, MD,  
11 Yoshihiko Araki<sup>2</sup>, MD, and Toshiaki Shimizu<sup>4</sup>, MD  
12

13  
14 Affiliations: <sup>1</sup>Perinatal Medical Center, Juntendo University Urayasu Hospital; <sup>2</sup>Institute  
15 for Environmental & Gender-specific Medicine, Juntendo University Graduate School  
16 of Medicine; <sup>3</sup>Department of Health Information Management, Yamagata Saisei  
17 Hospital; <sup>4</sup>Department of Pediatrics, Juntendo University Graduate School of Medicine  
18  
19

20  
21 Address correspondence to: Masato Kantake, Perinatal Medical Center, Juntendo  
22 University Urayasu Hospital, 2-1-1 Tomioka, Urayasu, Chiba 279-0021, Japan  
23  
24 Tel: 81-47-353-3111 Fax:81-47-353-3138  
25  
26 E-mail: kantake@juntendo-urayasu.jp  
27

28  
29 Keywords: DNA methylation, glucocorticoid receptor, promoter 1-F, postnatal  
30 environment, glucocorticoid receptor resistance  
31  
32  
33  
34  
35  
36  
37  
38  
39  
40  
41  
42  
43  
44  
45  
46  
47  
48  
49  
50  
51  
52  
53  
54  
55  
56  
57  
58  
59  
60

## ABSTRACT

**Objective:** To examine the environmental effects on cytosine methylation of preterm infant's DNA, because early life experiences are considered to influence the physiological and mental health of an individual through epigenetic modification of DNA.

**Design:** A prospective cohort study, comparison epigenetic differences in the glucocorticoid receptor (GR) gene between healthy term and preterm infants.

**Setting:** Neonatal Intensive Care Unit in a Japanese University Hospital

**Participants:** A cohort of 40 (20 term and 20 preterm) infants was recruited on the day of birth, and peripheral blood was obtained from each infant at birth and on postnatal day 4.

**Main outcome measures:** The methylation rates in the 1-F promoter region of the GR gene using the Mquant method.

**Results:** The methylation rate increased significantly between postnatal days 0 and 4 in preterm infants but remained stable in term infants. Thus, the methylation rate was significantly higher in preterm than in term infants at postnatal day 4. Several perinatal parameters were significantly correlated with this change in the methylation rate. Logistic regression analysis revealed that methylation rates at postnatal day 4 predicted the occurrence of later complications that required glucocorticoid administration during the neonatal period. No gene polymorphism was detected within the GR promoter region analyzed.

**Conclusions:** Although further large-scale studies are needed to detect the environmental factors that explain the difference in epigenetic modification among infants after birth, our data show that the postnatal environment influences epigenetic programming of GR expression through methylation of the GR gene promoter in premature infants, which may result in relative glucocorticoid insufficiency during the postnatal period.

**Strengths and limitations of the study**

- Postnatal environment resets the epigenetic modification of GR gene promoter during four days after birth in preterm infants.
- This epigenetic modification may result in relative glucocorticoid insufficiency during the postnatal period.
- Large-scale studies will be expected to clarify the environmental factors that explain the difference in epigenetic modification among infants after birth.

## Introduction

Many human and animal studies have documented the impact of early life experiences on the neurobiological regulation of stress responsiveness, mood, and anxiety disorders [1–4]. Maternal care, familial functioning, and childhood adversity all contribute to neurobiological regulation through epigenetic modification of DNA, which is thought to be highly stable across a lifespan [5–7]. Hippocampal glucocorticoid receptors (GRs) play a central role in modulating hypothalamus pituitary adrenal (HPA) axis activity [8–10]. Exon 1-F of the human GR gene is similar to rat exons 1–7, which is related to a maternal effect on cytosine methylation and expression [11]. Several human studies have reported a relationship between early life experience and epigenetic modification of the GR 1-F promoter region [11–16]. These studies have shown that adverse early life experiences, such as maternal depression in the third trimester, disruption of adequate nurturing, and history of childhood abuse, are associated with increased methylation of the GR promoter in leukocytes [12–15], the hippocampus [11], and the placenta [16].

The stress of birth exceeds that of any other critical life event. Indeed, exposure to preterm labor and postnatal environmental stress, including the requisite acute care and prolonged physical separation under neonatal intensive care, may be the most adverse

1  
2  
3  
4  
5  
6 environments during early life. Preterm birth is associated with significant long-term  
7  
8  
9 neurodevelopmental impairments [17-21].

10  
11 Increased methylation of the GR promoter in leukocytes may lead to down regulation of  
12  
13 cell surface GR expression that, in turn, results in glucocorticoid receptor resistance  
14  
15 (GCR). GCR refers to a decrease in the sensitivity of immune cells to glucocorticoid  
16  
17 hormones that normally terminate the inflammatory response [22-24]. Evidence for  
18  
19 GCR in response to prolonged stress has been found in humans, such as families of  
20  
21 patients with cancer or those reporting high levels of loneliness [25-27]. On the other  
22  
23 hand, relative adrenal insufficiency occurs when the HPA axis produces insufficient  
24  
25 cortisol relative to the degree of illness or stress. Several studies have reported a  
26  
27 relative adrenal insufficiency in infants who develop chronic lung disease (CLD)  
28  
29 [28,29] and cardiovascular instability [30-32] including late onset circulatory collapse  
30  
31 (LCC). LCC is thought to be caused by late-onset adrenal insufficiency. An  
32  
33 endocrinological study noted that even though relative glucocorticoid insufficiency in  
34  
35 preterm infants is an underlying factor contributing to LCC, cortisol concentrations did  
36  
37 not differ between the LCC and control infant groups [33,34]. Therefore, another  
38  
39 factor(s), including GCR, may be the cause of LCC.

40  
41  
42  
43  
44  
45  
46  
47  
48  
49  
50  
51  
52  
53  
54  
55 To test the hypothesis that an increase in cytosine methylation within the GR promoter  
56  
57  
58  
59  
60



1  
2  
3  
4  
5  
6 during the perinatal period in preterm infants causes physiological impairment in later  
7  
8  
9 life, we first compared epigenetic differences in the leukocyte GR promoter 1-F region  
10  
11 (containing 33 CpG sites ranging from -3479 bp to -3259 bp upstream of the ATG start  
12  
13 site) between healthy term and preterm infants on day 0 of birth and postnatal day 4.  
14  
15  
16 Furthermore, we examined the relationship between the postnatal change in the  
17  
18 methylation rates and perinatal parameters and whether the methylation status on  
19  
20 postnatal day 4 caused complications in the neonatal period, such as CLD and LCC,  
21  
22  
23  
24  
25  
26 which are thought to be caused by relative adrenal insufficiency.  
27  
28  
29  
30  
31  
32  
33  
34  
35  
36  
37  
38  
39  
40  
41  
42  
43  
44  
45  
46  
47  
48  
49  
50  
51  
52  
53  
54  
55  
56  
57  
58  
59  
60

## Methods

### *Prospective cohort study*

Our study was approved by the Juntendo University Urayasu Hospital Research Ethics Board, and the parents provided informed consent. We recruited a cohort of 40 consecutive infants (20 term and 20 preterm) on the day of birth between April and October 2012 at our hospital. Eligible term infants were born within 37–41 weeks of gestation and received routine postnatal care as follows: day 0, skin to skin contact for 30 min from 30 min after birth; day 1, nursing four times (vaginal delivery (VD)) or one time (Caesarean section (C/S)); day 2, rooming with the baby (VD), nursing one time (C/S); day 3, rooming with the baby (VD), nursing six times (C/S); day 4, discharge (VD), rooming with the baby (C/S); day 5, rooming with the baby (C/S); day 6, discharge (C/S)

An infant was defined as preterm if born before week 37 of gestation and admitted to the neonatal intensive care unit (NICU) as premature. Patients born before 37 weeks of gestation and who did not require admission to the NICU were excluded. All preterm infants in our study were exposed to maternal separation for at least 4 days after birth. Small for gestational age (SGA) was defined as weight below the 10<sup>th</sup> percentile for

1  
2  
3  
4  
5  
6 gestational age. The criteria for CLD were the need for additional oxygen after 28 days  
7  
8 of age [35]. The criteria for LCC were (1) sudden systemic hypotension (mean arterial  
9  
10 pressure < 35 mm Hg sustained for at least 3 h); (2) oliguria (< 1 ml kg<sup>-1</sup> h<sup>-1</sup> during an  
11  
12 8-h interval); (3) electrolyte abnormality (hyponatremia < 130 mEqL<sup>-1</sup>, hyperkalemia >  
13  
14 5.5 mEqL<sup>-1</sup>); and (4) excess body weight gain per day (15 gkg<sup>-1</sup> per day or 1.5% per  
15  
16 day). When more than two of these symptoms were detected 7 or more days postnatally,  
17  
18 and after all other common conditions causing systemic hypotension and oliguria, such  
19  
20 as hypovolemia, dehydration, symptomatic patent ductus arteriosus, and sepsis were  
21  
22 ruled out, corticosteroid treatment was started. LCC was diagnosed once the infant  
23  
24 responded to corticosteroid therapy. Daily changes in body weight, mean arterial  
25  
26 pressure, serum sodium and potassium concentrations, and urine output before and at  
27  
28 symptom onset were also assessed to help the attending physician make the diagnosis of  
29  
30 LCC [34].  
31  
32  
33  
34  
35  
36  
37  
38  
39  
40  
41  
42  
43  
44  
45  
46

#### 47 *Methylation analysis*

48  
49 Peripheral blood was obtained from the umbilical cord (day 0) or peripheral vein (day  
50  
51 4) from each infant and stored at -80°C until use. Blood was sampled at day 4 in term  
52  
53 infants in conjunction with a metabolic screening test recommended for all infants born  
54  
55  
56  
57  
58  
59  
60

1  
2  
3  
4  
5  
6 in Japan. According to the manufacture's instruction, genomic DNA was extracted from  
7  
8  
9 2  $\mu\text{L}$  of frozen peripheral blood and bisulfite treated using an EZ DNA Methylation  
10  
11 Direct Kit (Zymo Research Corp., Irvine, CA, USA); 1  $\mu\text{L}$  of the resulting 10  $\mu\text{L}$   
12  
13 bisulfite-treated genomic DNA solution was then subjected to polymerase chain  
14  
15 reaction (PCR) to amplify the GR promoter 1-F region, as described previously [11].  
16  
17  
18 The Mquant method described by Leakey et al. was used to calculate the GR promoter  
19  
20 methylation rate [36] (see Supplemental Methods).  
21  
22  
23  
24  
25  
26  
27  
28

### 29 *Statistical analysis*

30  
31  
32 We performed Wilcoxon's signed-rank test to evaluate the longitudinal difference  
33  
34 between days 0 and 4 after birth in preterm and term group infants. We performed the  
35  
36 Mann-Whitney *U*-test to compare the methylation rates in the preterm and term groups  
37  
38 at each CpG site. We performed the chi-square tests (for gestational age, birth weight,  
39  
40 and Apgar score (at 1 and 5 minutes)), and Mann-Whitney *U*-tests (for intrauterine  
41  
42 growth retardation, Caesarean section delivery, respiratory distress, mechanical  
43  
44 ventilation, intracranial hemorrhage, bacterial infection, and antenatal steroid  
45  
46 administration) to compare the characteristics of each group of infants as shown in  
47  
48  
49  
50  
51  
52  
53  
54  
55  
56  
57  
58  
59  
60  
61  
62  
63  
64  
65  
66  
67  
68  
69  
70  
71  
72  
73  
74  
75  
76  
77  
78  
79  
80  
81  
82  
83  
84  
85  
86  
87  
88  
89  
90  
91  
92  
93  
94  
95  
96  
97  
98  
99  
100  
101  
102  
103  
104  
105  
106  
107  
108  
109  
110  
111  
112  
113  
114  
115  
116  
117  
118  
119  
120  
121  
122  
123  
124  
125  
126  
127  
128  
129  
130  
131  
132  
133  
134  
135  
136  
137  
138  
139  
140  
141  
142  
143  
144  
145  
146  
147  
148  
149  
150  
151  
152  
153  
154  
155  
156  
157  
158  
159  
160  
161  
162  
163  
164  
165  
166  
167  
168  
169  
170  
171  
172  
173  
174  
175  
176  
177  
178  
179  
180  
181  
182  
183  
184  
185  
186  
187  
188  
189  
190  
191  
192  
193  
194  
195  
196  
197  
198  
199  
200  
201  
202  
203  
204  
205  
206  
207  
208  
209  
210  
211  
212  
213  
214  
215  
216  
217  
218  
219  
220  
221  
222  
223  
224  
225  
226  
227  
228  
229  
230  
231  
232  
233  
234  
235  
236  
237  
238  
239  
240  
241  
242  
243  
244  
245  
246  
247  
248  
249  
250  
251  
252  
253  
254  
255  
256  
257  
258  
259  
260  
261  
262  
263  
264  
265  
266  
267  
268  
269  
270  
271  
272  
273  
274  
275  
276  
277  
278  
279  
280  
281  
282  
283  
284  
285  
286  
287  
288  
289  
290  
291  
292  
293  
294  
295  
296  
297  
298  
299  
300  
301  
302  
303  
304  
305  
306  
307  
308  
309  
310  
311  
312  
313  
314  
315  
316  
317  
318  
319  
320  
321  
322  
323  
324  
325  
326  
327  
328  
329  
330  
331  
332  
333  
334  
335  
336  
337  
338  
339  
340  
341  
342  
343  
344  
345  
346  
347  
348  
349  
350  
351  
352  
353  
354  
355  
356  
357  
358  
359  
360  
361  
362  
363  
364  
365  
366  
367  
368  
369  
370  
371  
372  
373  
374  
375  
376  
377  
378  
379  
380  
381  
382  
383  
384  
385  
386  
387  
388  
389  
390  
391  
392  
393  
394  
395  
396  
397  
398  
399  
400  
401  
402  
403  
404  
405  
406  
407  
408  
409  
410  
411  
412  
413  
414  
415  
416  
417  
418  
419  
420  
421  
422  
423  
424  
425  
426  
427  
428  
429  
430  
431  
432  
433  
434  
435  
436  
437  
438  
439  
440  
441  
442  
443  
444  
445  
446  
447  
448  
449  
450  
451  
452  
453  
454  
455  
456  
457  
458  
459  
460  
461  
462  
463  
464  
465  
466  
467  
468  
469  
470  
471  
472  
473  
474  
475  
476  
477  
478  
479  
480  
481  
482  
483  
484  
485  
486  
487  
488  
489  
490  
491  
492  
493  
494  
495  
496  
497  
498  
499  
500  
501  
502  
503  
504  
505  
506  
507  
508  
509  
510  
511  
512  
513  
514  
515  
516  
517  
518  
519  
520  
521  
522  
523  
524  
525  
526  
527  
528  
529  
530  
531  
532  
533  
534  
535  
536  
537  
538  
539  
540  
541  
542  
543  
544  
545  
546  
547  
548  
549  
550  
551  
552  
553  
554  
555  
556  
557  
558  
559  
560  
561  
562  
563  
564  
565  
566  
567  
568  
569  
570  
571  
572  
573  
574  
575  
576  
577  
578  
579  
580  
581  
582  
583  
584  
585  
586  
587  
588  
589  
590  
591  
592  
593  
594  
595  
596  
597  
598  
599  
600  
601  
602  
603  
604  
605  
606  
607  
608  
609  
610  
611  
612  
613  
614  
615  
616  
617  
618  
619  
620  
621  
622  
623  
624  
625  
626  
627  
628  
629  
630  
631  
632  
633  
634  
635  
636  
637  
638  
639  
640  
641  
642  
643  
644  
645  
646  
647  
648  
649  
650  
651  
652  
653  
654  
655  
656  
657  
658  
659  
660  
661  
662  
663  
664  
665  
666  
667  
668  
669  
670  
671  
672  
673  
674  
675  
676  
677  
678  
679  
680  
681  
682  
683  
684  
685  
686  
687  
688  
689  
690  
691  
692  
693  
694  
695  
696  
697  
698  
699  
700  
701  
702  
703  
704  
705  
706  
707  
708  
709  
710  
711  
712  
713  
714  
715  
716  
717  
718  
719  
720  
721  
722  
723  
724  
725  
726  
727  
728  
729  
730  
731  
732  
733  
734  
735  
736  
737  
738  
739  
740  
741  
742  
743  
744  
745  
746  
747  
748  
749  
750  
751  
752  
753  
754  
755  
756  
757  
758  
759  
760  
761  
762  
763  
764  
765  
766  
767  
768  
769  
770  
771  
772  
773  
774  
775  
776  
777  
778  
779  
780  
781  
782  
783  
784  
785  
786  
787  
788  
789  
790  
791  
792  
793  
794  
795  
796  
797  
798  
799  
800  
801  
802  
803  
804  
805  
806  
807  
808  
809  
810  
811  
812  
813  
814  
815  
816  
817  
818  
819  
820  
821  
822  
823  
824  
825  
826  
827  
828  
829  
830  
831  
832  
833  
834  
835  
836  
837  
838  
839  
840  
841  
842  
843  
844  
845  
846  
847  
848  
849  
850  
851  
852  
853  
854  
855  
856  
857  
858  
859  
860  
861  
862  
863  
864  
865  
866  
867  
868  
869  
870  
871  
872  
873  
874  
875  
876  
877  
878  
879  
880  
881  
882  
883  
884  
885  
886  
887  
888  
889  
890  
891  
892  
893  
894  
895  
896  
897  
898  
899  
900  
901  
902  
903  
904  
905  
906  
907  
908  
909  
910  
911  
912  
913  
914  
915  
916  
917  
918  
919  
920  
921  
922  
923  
924  
925  
926  
927  
928  
929  
930  
931  
932  
933  
934  
935  
936  
937  
938  
939  
940  
941  
942  
943  
944  
945  
946  
947  
948  
949  
950  
951  
952  
953  
954  
955  
956  
957  
958  
959  
960  
961  
962  
963  
964  
965  
966  
967  
968  
969  
970  
971  
972  
973  
974  
975  
976  
977  
978  
979  
980  
981  
982  
983  
984  
985  
986  
987  
988  
989  
990  
991  
992  
993  
994  
995  
996  
997  
998  
999  
1000

1  
2  
3  
4  
5  
6 relationships of the increased ratio of methylation rates as a dependent variable, with the  
7  
8 perinatal parameters in preterm infants as independent variables. To perform this  
9  
10 stepwise multiple regression analysis, several nominal variables were converted to  
11  
12 categorical variables by grouping values into two categories. The adjusted coefficient  
13  
14 of determination ( $R^2$ ) is the fraction of information of the dependent variable that is  
15  
16 explained by the independent variables. Logistic regression analysis was performed to  
17  
18 investigate the relationships between the methylation rate at 4 days as a dependent  
19  
20 variable with later complications in the neonatal period as independent variables. The  
21  
22 goodness of fit of the logistic regression models was assessed using Pearson residuals.  
23  
24 The pseudo- $R^2$  is the fraction of information of the dependent variable that is explained  
25  
26 by the independent variables [37]. We used the likelihood ratio test to test the hypothesis  
27  
28 regarding which dependent variable is significantly better among the four CpGs. A  $p$ -  
29  
30 value  $< 0.05$  (two-tailed) was considered significant. All statistical analyses were  
31  
32 carried out using the StatView R 5.0J for Windows (SAS Institute, Cary, NC, USA)  
33  
34 software package.  
35  
36  
37  
38  
39  
40  
41  
42  
43  
44  
45  
46  
47  
48  
49  
50  
51  
52  
53  
54  
55  
56  
57  
58  
59  
60

## Results

### *Participant characteristics*

Thirty-nine of the 40 participants completed the analysis. Bisulfite-treated genomic DNA from one infant from the preterm group could not be amplified by PCR for unknown reasons. The characteristics of the infants are shown in Table 1. Ten of 19 preterm infants received antenatal steroids. The preterm infants had higher rates of intrauterine growth retardation than that of infants delivered by Caesarean section. They had lower Apgar scores at 1 min and 5 min compared with those of term infants. Preterm infants displayed higher rates of respiratory distress and required mechanical ventilation more frequently during the postnatal period than did term infants. None of the infants experienced a bacterial infection or intracranial hemorrhage through postnatal day 4. No gene polymorphism was detected within the GR promoter region analyzed.

### *Longitudinal changes in methylation status*

We examined 33 CpG sites in the GR 1-F promoter. In preterm infants, methylation rates significantly increased between birth and postnatal day 4 at 11 CpG sites (1,  $p =$

1  
2  
3  
4  
5  
6 0.022; 2,  $p = 0.044$ ; 8,  $p = 0.00029$ ; 9,  $p = 0.049$ ; 10,  $p = 0.044$ ; 14,  $p = 0.0013$ ; 16,  $p =$   
7  
8  
9 0.0022; 25,  $p = 0.036$ ; 26,  $p = 0.049$ ; 28,  $p = 0.00097$ ; 29,  $p = 0.016$ ) and significantly  
10  
11 decreased at one CpG site (4,  $p = 0.030$ ). In contrast, methylation rates between birth  
12  
13 and postnatal day 4 were stable in term infants (Figure 1).  
14  
15  
16  
17  
18  
19

#### 20 *Cross-sectional differences in methylation status*

21  
22  
23 Methylation rates in preterm infants at birth were lower at three CpG sites (1;  $p = 0.033$ ,  
24  
25 5;  $p = 0.0024$ , 8;  $p = 0.0001$ ) and higher at one site (4;  $p = 0.040$ ) compared with those  
26  
27 in term infants. Methylation rates on postnatal day 4 were significantly higher in  
28  
29 preterm infants compared with term infants at seven CpG sites (15,  $p = 0.00061$ ; 16,  $p =$   
30  
31 0.0083; 21,  $p = 0.043$ ; 25,  $p = 0.0098$ ; 26,  $p = 0.0050$ ; 27,  $p = 0.00040$ ; 28,  $p = 0.038$ ).  
32  
33  
34  
35  
36  
37

38 Methylation rates in preterm infants were not lower than those of term infants at any  
39  
40 CpG site (Figure 2).  
41  
42

43  
44 Figure 3 shows the changes in methylation status in each group between birth and  
45  
46 postnatal day 4 at CpG sites 16, 25, 26, and 28. Methylation rates at these sites  
47  
48 significantly increased only in preterm infants, resulting in a significantly higher  
49  
50 methylation rate in preterm than in term infants on postnatal day 4.  
51  
52  
53  
54  
55  
56  
57  
58  
59  
60

1  
2  
3  
4  
5  
6 *Relationship between methylation rates at birth and perinatal parameters*  
7

8  
9 We analyzed the relationship between the methylation rates at birth at CpG sites 1, 4, 5,  
10  
11 and 8 and prenatal parameters such as gestational age, birth weight, SGA, antenatal  
12  
13 steroid administration, and mode of delivery. We found no significant correlation among  
14  
15  
16  
17  
18 them.  
19

20  
21  
22  
23 *Relationship between the increase in the methylation rate ratio and perinatal*  
24  
25  
26  
27 *parameters*  
28

29 To examine the relationship between the increased methylation rate ratio and perinatal  
30  
31 parameters, we chose 12 CpG sites (1, 2, 4, 8, 9, 10, 14, 16, 25, 26, 28, and 29) in which  
32  
33 the methylation rates were significantly increased (with the exception of CpG4), and  
34  
35 calculated the ratio as the methylation rate at day 4 divided by that at day 0. Then we  
36  
37 investigated the relationship between the change in ratio at each CpG site and the  
38  
39 perinatal parameters of gestational age, birth weight, Apgar score, mode of delivery,  
40  
41  
42  
43  
44  
45  
46  
47 SGA, respiratory distress syndrome (RDS), mechanical ventilation, antenatal steroid  
48  
49 administration, and admission to the NICU. We found associations between these  
50  
51 parameters and an increase in the methylation rate ratio at CpG4, CpG8, CpG10,  
52  
53  
54  
55  
56 CpG25, and CpG29. The change in methylation ratio at each CpG site was associated  
57  
58  
59  
60



1  
2  
3  
4  
5  
6 with following perinatal parameters in the parenthesis: CpG4 (gestational age and Apgar  
7  
8 score at 1 min [regression coefficient = 0.029 and -0.085, respectively; overall  $p$ -value =  
9  
10 0.004; adjusted- $R^2$  = 0.223]); CpG8 (SGA, Caesarean section, Apgar score at 5 min, and  
11  
12 NICU admission [regression coefficient = 0.43, -0.31, 0.16, and 0.79, respectively;  
13  
14 overall  $p$ -value < 0.0001; adjusted- $R^2$  = 0.573]); CpG10 (NICU admission [regression  
15  
16 coefficient = 0.29; overall  $p$ -value = 0.037; adjusted- $R^2$  = 0.089]); CpG25 (SGA  
17  
18 [regression coefficient = 0.86, overall  $p$ -value = 0.009, adjusted- $R^2$  = 0.15]); and CpG29  
19  
20 (SGA [regression coefficient = 0.096, overall  $p$ -value = 0.039, adjusted- $R^2$  = 0.086]),  
21  
22  
23  
24  
25  
26  
27  
28  
29 respectively.

30  
31  
32  
33  
34  
35 *Relationship between methylation rate at postnatal day 4 and complications during the*  
36  
37  
38 *neonatal period*

39  
40 We chose four CpG sites (16, 25, 26, and 28) shown in Figure 3 to investigate the  
41  
42 relationship between methylation status on postnatal day 4 and complications during the  
43  
44 perinatal period. Then, we analyzed the relationship between the methylation rate at  
45  
46 these CpG sites on postnatal day 4 and subsequent complications. There were four  
47  
48 preterm infants who had some complications and needed glucocorticoid administration  
49  
50 during the neonatal period. (CLD;  $n=3$ , LCC;  $n=3$ ) Except for these four cases, no  
51  
52  
53  
54  
55  
56  
57  
58  
59  
60

1  
2  
3  
4  
5  
6 infant received glucocorticoid therapy postnatally.  
7

8  
9 The logistic regression models were statistically fit (Pearson residuals,  $\chi^2 = 19.284$ ,  $p =$   
10  
11  
12 0.9799, pseudo- $R^2 = 0.429$ ). CpG16 had a significantly better explanatory factor among  
13  
14  
15 four CpGs (likelihood ratio test  $\chi^2 = 3.889$ ,  $p = 0.0486$ ).  
16  
17  
18  
19  
20  
21  
22  
23  
24  
25  
26  
27  
28  
29  
30  
31  
32  
33  
34  
35  
36  
37  
38  
39  
40  
41  
42  
43  
44  
45  
46  
47  
48  
49  
50  
51  
52  
53  
54  
55  
56  
57  
58  
59  
60

## Discussion

Our study is the first longitudinal analysis of GR promoter methylation in humans during the perinatal period, the stage that is thought to be the most susceptible to epigenetic regulation. The present study demonstrated that postnatal exposure to an adverse environment in preterm infants influences epigenetic programming of the glucocorticoid response via GR promoter methylation during the neonatal period.

We found that perinatal parameters such as gestational age, intrauterine growth, Apgar score, and mode of delivery were predictors for changes in methylation rates at CpG sites in the GR promoter as well as NICU admission.

It should be noted that gestational age was positively associated with an increase in the methylation ratio at CpG4. Exposure to preterm labor may be an adverse environment in early life. Therefore, the methylation rate ratio at CpG4 should be negatively associated with gestational age. CpG4 was the only site at which the methylation rates in preterm infants were significantly higher than those in term infants at birth. Moreover, CpG4 was the only site at which the methylation rate was lower on postnatal day 4 than on day 0. Taken together, the change in methylation at CpG4 seemed to be regulated inversely, compared with other CpG sites. The mechanisms underlying DNA methylation and demethylation probably develop due to unfavorable experiences during

1  
2  
3  
4  
5  
6 early life; however, recent studies that have investigated other transcripts of the GR  
7  
8  
9 gene have proposed a more complex child maltreatment-induced DNA methylation  
10  
11 model than previously described for exon 1-F [38]. In the present study, CpG4 may be a  
12  
13 transcriptionally silent methylation site that mediated aberrant epigenetic regulation, as  
14  
15 proposed by Lutz et al [38]. Low Apgar score, which is thought to be an unfavorable  
16  
17 experience during the perinatal period, is positively associated with the CpG4  
18  
19 methylation ratio increase and negatively associated with that of CpG8. Thus, low  
20  
21 Apgar score may have a negative effect on methylation in most CpG sites in the GR 1-F  
22  
23 promoter. One possible explanation is that low Apgar score indicates an adverse  
24  
25 condition of cardiopulmonary function, which, in turn, inactivates the enzymatic  
26  
27 cascade for DNA methylation. Stable oxygen and energy supplements may be necessary  
28  
29 to open the window for epigenetic programming by DNA methylation. Caesarean  
30  
31 section delivery was negatively associated with an increase in the methylation ratio at  
32  
33 CpG8. This obstetrical intervention may partially reduce stress-induced epigenetic  
34  
35 programming of the GR promoter. SGA was positively associated with an increase in  
36  
37 methylation rate ratio at CpG8, 25, and 29. The intrauterine environment, like the  
38  
39 postnatal environment, can affect fetal epigenetic modification of DNA. SGA infants  
40  
41 have been thought to demonstrate epigenomic dysregulation, which mediates the long-  
42  
43  
44  
45  
46  
47  
48  
49  
50  
51  
52  
53  
54  
55  
56  
57  
58  
59  
60

1  
2  
3  
4  
5  
6 term consequences of intrauterine growth restriction at birth [39,40]. The present study  
7  
8  
9 showed that, in the GR gene, SGA might influence the infant's susceptibility to the  
10  
11  
12 postnatal environment rather than epigenomic dysregulation at birth. As we expected,  
13  
14  
15 NICU admission followed by maternal separation was positively associated with an  
16  
17  
18 increase in the methylation rate ratio at CpG8 and 10. Taken together, we could  
19  
20  
21 approximately estimate the relationship between perinatal parameters and changes in  
22  
23  
24 methylation rates at CpG sites in the GR promoter. Further precise analysis should give  
25  
26  
27 insights into the host-environment interaction.

28  
29 Four preterm infants needed glucocorticoid administration during the postnatal period  
30  
31  
32 due to CLD or LCC. The logistic regression models were statistically fit to predict the  
33  
34  
35 development of these complications (CLD and LCC), which were thought to be partly  
36  
37  
38 related to relative adrenal insufficiency. CpG16 had a significantly better explanatory  
39  
40  
41 factor among the four CpGs in which methylation rates increased significantly only in  
42  
43  
44 preterm infants resulting in a significantly higher methylation rate in preterm than in  
45  
46  
47 term infants on postnatal day 4. CpG16 is a binding site for nerve growth factor  
48  
49  
50 inducible protein A (NGFI-A), which has emerged as a central regulator of early  
51  
52  
53 inflammatory and immune processes and potentiates GR 1-F promoter activity [11,41-  
54  
55  
56 43].  
57  
58  
59  
60

1  
2  
3  
4  
5  
6 Taken together, our results suggest that the high methylation rate observed in leukocyte  
7  
8  
9 GR promoters may result in GR unresponsiveness to early inflammatory stimuli by  
10  
11  
12 NGFI-A, followed by GCR and/or a failure to downregulate inflammatory responses by  
13  
14  
15 glucocorticoids [44].

16  
17  
18 One limitation of our study was the small sample size. Further studies with larger  
19  
20  
21 sample sizes that include patients with chronic inflammation are needed.  
22  
23  
24  
25  
26  
27  
28  
29  
30  
31  
32  
33  
34  
35  
36  
37  
38  
39  
40  
41  
42  
43  
44  
45  
46  
47  
48  
49  
50  
51  
52  
53  
54  
55  
56  
57  
58  
59  
60

## Conclusions

We found marked changes in DNA methylation induced by the postnatal environment during the 4 days immediately after birth. Moreover, the methylation status at postnatal day 4 may predict the development of complications during the neonatal period, which is thought to be induced by relative glucocorticoid insufficiency in preterm infants.

### **Contributors**

MK and TS conceptualized and designed the study. MK carried out the initial analyses.

HY designed the data collection instruments, and coordinated and supervised data collection. HI performed statistical analysis. MK and drafted the initial manuscript, and revised the manuscript.

MK, HY, HI, YA and TS approved the final manuscript as submitted.

### **Funding**

This work was supported in part by Grants-in-Aid for General Scientific Research, Nos. 24659511 (M.K.), 23390389 (Y.A.) and “High-Tech Research Center” Project for Private Universities: matching fund subsidy from the Ministry of Education, Culture, Sports, Science, and Technology, Japan.

### **Competing interests**

Financial Disclosure: The authors have no financial relationships relevant to this article to disclose. Conflict of Interest: The authors have no conflict of interest to disclose.



**Data sharing**

No additional data are available.

**Acknowledgements**

The authors express our appreciation to Dr. Satoru Yamaguchi for sample collection.

We are deeply indebted to Drs. Kaoru Obinata and Kenji Takamori for their encouragement throughout the course of this study.

## References

1. Kaufman J, Charney D. Effects of early stress on brain structure and function: Implications for understanding the relationship between child maltreatment and depression. *Dev Psychopathol* 2001;**13**:451.
2. Kessler RC, Davis CG, Kendler KS. Childhood adversity and adult psychiatric disorder in the US National Comorbidity Survey. *Psychol Med* 1997;**27**:1101-1119.
3. Schilling EA, Aseltine RHJr, Gore S. Adverse childhood experiences and mental health in young adults: a longitudinal survey. *BMC Public Health* 2007;**7**:30.
4. De Kloet ER, Joels M, Holsboer F. Stress and brain: from adaptation to disease. *Nat. Rev. Neurosci.* 2005;**6**:463-475.
5. De Bellis MD, Chrousos GP, Dorn LD, et al. Hypothalamic-pituitary-adrenal axis dysregulation in sexually abused girls. *J Clin Endocrinol Metab* 1994;**78**:249-255.
6. Weaver ICG. Epigenetic programming by maternal behavior and pharmacological intervention. Nature versus nurture: let's call the whole thing off. *Epigenetics* 2007;**2**: 22-28.
7. Champagne FA, Curley JP. Epigenetic mechanisms mediating the long-term effects of maternal care on development. *Neurosci Biobehav Rev* 2009;**33**:593-600.
8. Liu D, Diorio J, Tannenbaum B, et al. Maternal care, hippocampal glucocorticoid

- 1  
2  
3  
4  
5  
6 receptors, and hypothalamic-pituitary-adrenal responses to stress. *Science*  
7  
8  
9 1997;**277**:1659-62.
- 10  
11 9. Weaver ICG, Cervoni N, Champagne FA, et al. Epigenetic programming by  
12  
13 maternal behavior. *Nat Neurosc.* 2004;**7**:847-854.
- 14  
15  
16  
17 10. Boyle MP, Brewer JA, Funatsu M, et al. Acquired deficit of forebrain glucocorticoid  
18  
19 receptor produces depression-like changes in adrenal axis regulation and behavior.  
20  
21  
22  
23 *Proc Natl Acad Sci USA* 2005;**102**:473-478.
- 24  
25  
26 11. McGowan PO, Sasaki A, D'Alessio AC, et al. Epigenetic regulation of the  
27  
28 glucocorticoid receptor in human brain associates with childhood abuse. *Nat*  
29  
30  
31  
32  
33  
34 *Neurosci* 2009;**12**:342-348.
- 35  
36 12. Oberlander TF, Weinberg J, Papsdorf M, et al. Prenatal exposure to maternal  
37  
38 depression, neonatal methylation of human glucocorticoid receptor gene (*NR3C1*)  
39  
40 and infant cortisol stress responses. *Epigenetics* 2008;**3**:97-106.
- 41  
42  
43  
44 13. Tyrka AR, Price LH, Marsit C, et al. Childhood adversity and epigenetic modulation  
45  
46 of the leukocyte glucocorticoid receptor: preliminary findings in healthy adults.  
47  
48  
49  
50  
51 *PloS ONE* 2012;**7**:e30148.
- 52  
53 14. Perroud N, Paoloni-Giacobino A, Prada P, et al. Increased methylation of  
54  
55 glucocorticoid receptor gene (*NR3C1*) in adults with a history of childhood  
56  
57  
58  
59  
60

- 1  
2  
3  
4  
5  
6 maltreatment: a link with the severity and type of trauma. *Transl Psychiatry*  
7  
8  
9 2011;**1**:e59.  
10  
11  
12 15. Mulligan CJ, D'Errico NC, Stees J, et al. Methylation changes at NR3C1 in  
13  
14 newborns associate with maternal prenatal stress exposure and newborn birth weight.  
15  
16 *Epigenetics* 2012; **7**:853-857.  
17  
18  
19  
20  
21 16. Bromer C, Marsit CJ, Armstrong DA, et al. Genetic and epigenetic variation of the  
22  
23 glucocorticoid receptor (NR3C1) in placenta and infant neurobehavior. *Dev*  
24  
25 *Psychobiol* 2013;**55**:673-83.  
26  
27  
28  
29  
30 17. Hack M, Flannery DJ, Schluchter M, et al. Outcomes in young adulthood for very-  
31  
32 low-birth-weight infants. *N Engl J Med* 2002;**346**:149-157.  
33  
34  
35  
36 18. Marlow N. Neurocognitive outcome after very preterm birth. *Arch Dis Child Fetal*  
37  
38 *Neonatal Ed* 2004;**89**: F224-228.  
39  
40  
41  
42 19. Aylward GP. Cognitive and neuropsychological outcomes: more than IQ scores.  
43  
44 *Ment Retard Dev Disabil Res Rev* 2002;**8**:234-240.  
45  
46  
47 20. Larroque B, Ancel PY, Marret S, et al. ; EPIPAGE Study Group.  
48  
49 Neurodevelopmental disabilities and special care of 5-year-old children born before  
50  
51 33 weeks of gestation (the EPIPAGE study): a longitudinal cohort study. *Lancet*  
52  
53  
54  
55 2008;**371**:813-820.  
56  
57  
58  
59  
60

- 1  
2  
3  
4  
5  
6 21. Hack M. Adult outcomes of preterm children. *J Dev Behav Pediatr* 2009;**30**:460-70.  
7  
8  
9 22. Marques AH, Silverman MN, Sternberg EM. Glucocorticoid dysregulation and their  
10  
11 clinical correlates. From receptors to therapeutics. *Ann NY Acad Sci* 2009;**1179**:1-  
12  
13 18.  
14  
15  
16  
17 23. Stark JL, Avitsur R, Padgett DA, et al. Social stress induces glucocorticoid  
18  
19 resistance in macrophages. *Am J Physiol* 2001;**280**:1799-1805.  
20  
21  
22  
23 24. Silverman MN, Sternberg EM. Glucocorticoid regulation of inflammation and its  
24  
25 functional correlates: from HPA axis to glucocorticoid receptor dysfunction. *Ann NY*  
26  
27 *Acad Sci* 2012;**1261**:55-63.  
28  
29  
30  
31 25. Cole SW. Social regulation of leukocyte homeostasis: The role of glucocorticoid  
32  
33 sensitivity. *Brain Behav Immun* 2008;**22**:1049-1055.  
34  
35  
36  
37 26. Miller GE, Cohen S, Ritchey AK. Chronic psychological stress and the regulation of  
38  
39 pro-inflammatory cytokines: A glucocorticoid-resistance model. *Health Psychol*  
40  
41 2002;**21**:531-541.  
42  
43  
44  
45 27. Miller GE, Chen E, Sze J, et al. A functional genomic fingerprint of chronic stress in  
46  
47 humans: blunted glucocorticoid and increased NF-kappaB signaling. *Biol Psychiatry*  
48  
49 2008;**64**:266-272.  
50  
51  
52  
53  
54  
55 28. Watterberg KL, Scott SM. Evidence of early adrenal insufficiency in babies who  
56  
57  
58  
59  
60

- 1  
2  
3  
4  
5  
6 develop bronchopulmonary dysplasia. *Pediatrics* 1995;**95**:120-125.  
7  
8  
9 29. Watterberg KL, Gerdes JS, Cole CH, et al. Prophylaxis of early adrenal  
10  
11 insufficiency to prevent bronchopulmonary dysplasia: a multicenter trial. *Pediatrics*  
12  
13 2004;**114**:1649-1657.  
14  
15  
16  
17 30. Ng PC, Lam CW, Fok TF, et al. Refractory hypotension in preterm infants with  
18  
19 adrenocortical insufficiency. *Arch Dis Child Fetal Neonatal Ed* 2001;**84**:F122-F124.  
20  
21  
22  
23 31. Arnold JD, Bonacruz G, Leslie GI, et al. Antenatal glucocorticoids modulate the  
24  
25 amplitude of pulsatile cortisol secretion in premature neonates. *Pediatr Res*  
26  
27 1998;**44**:876-881.  
28  
29  
30  
31  
32 32. Yoder B, Martin H, McCurnin DC, et al. Impaired urinary cortisol excretion and  
33  
34 early cardiopulmonary dysfunction in immature baboon. *Pediatr Res* 2002;**51**:426-  
35  
36 432.  
37  
38  
39  
40  
41 33. Masumoto K, Kusuda S, Aoyagi H, et al. Comparison of serum cortisol  
42  
43 concentrations in preterm infants with or without late-onset circulatory collapse due  
44  
45 to adrenal insufficiency of prematurity. *Pediatr Res* 2008;**63**:686-690.  
46  
47  
48  
49 34. Nakanishi H, Yamanaka S, Koriyama T, et al. Clinical characterization and long-  
50  
51 term prognosis of neurological development in preterm infants with late-onset-  
52  
53 circulatory collapse. *J perinatol* 2010;**30**:751-756.  
54  
55  
56  
57  
58  
59  
60

- 1  
2  
3  
4  
5  
6 35. Jobe AH, Bancalari E. Bronchopulmonary dysplasia. *Am J Respir Crit Care Med*  
7  
8  
9 2001;**163**:1723-9.  
10  
11 36. Leakey TI, Zielinski J, Siegfried RN, et al. A simple algorithm for quantifying DNA  
12  
13 methylation levels on multiple independent CpG sites in bisulfite genomic  
14  
15 sequencing electropherograms. *Nucleic Acids Res* 2008;**36**:e64.  
16  
17  
18  
19 37. Cameron AC, Windmeijer FAG. An R-squared measure of goodness of fit for some  
20  
21 common nonlinear regression models. *Journal of Econometrics* 1997;**77**:329-342.  
22  
23  
24  
25 38. Lutz PE, Turecki G. DNA methylation and childhood maltreatment: from animal  
26  
27 models to human studies. *Neuroscience* 2013;**7**:in press.  
28  
29  
30  
31 39. Godfrey KM, Lillycrop KA, Burdge GC, et al. Epigenetic mechanisms and the  
32  
33 mismatch concept of the developmental origins of health and disease. *Pediatric*  
34  
35 *Research* 2007; **61**:5R-10R.  
36  
37  
38  
39 40. Einstein F, Thompson RF, Bhagat TD, et al. Cytosine methylation dysregulation in  
40  
41 neonates following intrauterine growth restriction. *PLoS One* 2010;**5**:e8887.  
42  
43  
44  
45 41. Weaver ICG, D'Alessio AC, Brown SE, et al. The transcription factor nerve growth  
46  
47 factor - inducible protein A mediates epigenetic programming: altering epigenetic  
48  
49 marks by immediate - early genes. *J Neurosci* 2007;**27**:1756-1768.  
50  
51  
52  
53 42. Cullen EM, Brazil JC, O'Connor CM. Mature human neutrophils constitutively  
54  
55  
56  
57  
58  
59  
60

1  
2  
3  
4  
5  
6 express the transcription factor EGR-1. *Mol Immunol* 2010;**47**:1701-9.  
7

8  
9 43. Seiler MP, Mathew R, Liszewski MK, et al. Elevated and sustained expression of  
10  
11 the transcription factors Egr1 and Egr2 controls NKT lineage differentiation in  
12  
13 response to TCR signaling. *Nature Immunol* 2012;**13**:264-271.  
14  
15

16  
17 44. Cohen S, Janicki-Deverts D, Doyle WJ, et al. Chronic stress, glucocorticoid receptor  
18  
19 resistance, inflammation, and disease risk. *Proc Natl Acad Sci USA* 2012;**109**:5995-  
20  
21 5999.  
22  
23  
24  
25  
26  
27  
28  
29  
30  
31  
32  
33  
34  
35  
36  
37  
38  
39  
40  
41  
42  
43  
44  
45  
46  
47  
48  
49  
50  
51  
52  
53  
54  
55  
56  
57  
58  
59  
60



## Figure Legends

Figure 1. Longitudinal analysis of the methylation rate of the glucocorticoid receptor (GR) gene promoter in the leukocyte calculated using the Mquant method.

The percentage of methylation at each CpG site (mean  $\pm$  SEM) in the GR promoter isolated in peripheral blood collected from term and preterm infants at birth (dark gray bar) and postnatal day 4 (light gray bar), respectively. Wilcoxon's signed-rank test was performed to compare the methylation rate on day 0 and day 4 at each CpG site. A *p*-value  $<0.05$  (two tailed) was considered statistically significant.

Closed star symbol, significant increase in methylation rate; Open star symbol, significant decrease in methylation rate. No significant changes in methylation rate between postnatal days 0 and 4 were observed in term infants.

Figure 2. Cross-sectional analysis of the methylation rates of the glucocorticoid receptor (GR) gene promoter in leukocytes determined using the Mquant method

Percentage of methylation at each CpG site (mean  $\pm$  SEM) in the GR promoter isolated from peripheral blood collected at birth and on postnatal day 4 in term (dark gray bar) and preterm (light gray bar) infants, respectively. Mann-Whitney *U*-tests were performed to compare the methylation rates in preterm and term infants at each CpG site. A *p*-value  $<0.05$  (two tailed) was considered statistically significant.

Closed star symbol, methylation rate significantly higher in preterm compared to term infants; Open star symbol, methylation rate significantly lower in preterm compared to term infants.

Figure 3. Change in methylation status between birth and postnatal day 4 at CpG sites 16, 25, 26, and 28. Methylation rates at these sites were significantly greater in preterm than in term infants resulting in a significantly higher methylation rate ratio in the preterm infants on postnatal day 4. The day 0 and day 4 methylation rate ratios were compared using Wilcoxon's signed-rank test. The Mann-Whitney *U*-test was performed to compare the methylation rates in preterm infants with those in term infants. ns, not significant.

|                                             | Preterm<br>(n=19) | Term<br>(n=20)    | <i>p</i> value<br>(preterm<br>vs term) |
|---------------------------------------------|-------------------|-------------------|----------------------------------------|
| <b>Gestational age (weeks) (Mean ± SD)</b>  | <b>30.8 ± 3.2</b> | <b>39.8 ± 1.3</b> | <b>&lt;0.001</b>                       |
| <b>Birth weight (g) (Mean ± SD)</b>         | <b>1431 ± 605</b> | <b>3076 ± 271</b> | <b>&lt;0.001</b>                       |
| <b>Intrauterine growth retardation (n)</b>  | <b>7</b>          | <b>1</b>          | <b>0.014</b>                           |
| <b>Caesarean section delivery (n)</b>       | <b>15</b>         | <b>3</b>          | <b>&lt;0.001</b>                       |
| <b>Apgar score at 1 min (Mean ± SD)</b>     | <b>6.3 ± 2.6</b>  | <b>9 ± 0</b>      | <b>&lt;0.001</b>                       |
| <b>Apgar score at 5 min (Mean ± SD)</b>     | <b>8.4 ± 1.2</b>  | <b>10 ± 0</b>     | <b>&lt;0.001</b>                       |
| <b>Respiratory distress (n)</b>             | <b>10</b>         | <b>0</b>          | <b>&lt;0.001</b>                       |
| <b>Mechanical ventilation (n)</b>           | <b>10</b>         | <b>0</b>          | <b>&lt;0.001</b>                       |
| <b>Intracranial hemorrhage (n)</b>          | <b>0</b>          | <b>0</b>          | <b>1</b>                               |
| <b>Bacterial infection (n)</b>              | <b>0</b>          | <b>0</b>          | <b>1</b>                               |
| <b>Antenatal steroid administration (n)</b> | <b>10</b>         | <b>0</b>          | <b>&lt;0.001</b>                       |

Table1; Participant characteristics

1  
2  
3  
4  
5 **Postnatal epigenetic modification of glucocorticoid receptor gene in preterm**  
6 **infants: a prospective cohort study**  
7  
8

9  
10 Masato Kantake<sup>1</sup>, MD, Hiroshi Yoshitake<sup>2</sup>, MD, Hitoshi Ishikawa<sup>3</sup>, MD,  
11 Yoshihiko Araki<sup>2</sup>, MD, and Toshiaki Shimizu<sup>4</sup>, MD  
12

13  
14 Affiliations: <sup>1</sup>Perinatal Medical Center, Juntendo University Urayasu Hospital; <sup>2</sup>Institute  
15 for Environmental & Gender-specific Medicine, Juntendo University Graduate School  
16 of Medicine; <sup>3</sup>Department of Health Information Management, Yamagata Saisei  
17 Hospital; <sup>4</sup>Department of Pediatrics, Juntendo University Graduate School of Medicine  
18  
19

20  
21 Address correspondence to: Masato Kantake, Perinatal Medical Center, Juntendo  
22 University Urayasu Hospital, 2-1-1 Tomioka, Urayasu, Chiba 279-0021, Japan  
23  
24 Tel: 81-47-353-3111 Fax:81-47-353-3138  
25  
26 E-mail: kantake@juntendo-urayasu.jp  
27

28  
29 Keywords: DNA methylation, glucocorticoid receptor, promoter 1-F, postnatal  
30 environment, glucocorticoid receptor resistance  
31  
32  
33  
34  
35  
36  
37  
38  
39  
40  
41  
42  
43  
44  
45  
46  
47  
48  
49  
50  
51  
52  
53  
54  
55  
56  
57  
58  
59  
60

**ABSTRACT**

**Objective:** To examine the environmental effects on cytosine methylation of preterm infant's DNA, because early life experiences are considered to influence the physiological and mental health of an individual through epigenetic modification of DNA.

**Design:** A prospective cohort study, comparison epigenetic differences in the glucocorticoid receptor (GR) gene between healthy term and preterm infants.

**Setting:** Neonatal Intensive Care Unit in a Japanese University Hospital

**Participants:** A cohort of 40 (20 term and 20 preterm) infants was recruited on the day of birth, and peripheral blood was obtained from each infant at birth and on postnatal day 4.

**Main outcome measures:** The methylation rates in the 1-F promoter region of the GR gene using the Mquant method.

**Results:** The methylation rate increased significantly between postnatal days 0 and 4 in preterm infants but remained stable in term infants. Thus, the methylation rate was significantly higher in preterm than in term infants at postnatal day 4. Several perinatal parameters were significantly correlated with this change in the methylation rate. Logistic regression analysis revealed that methylation rates at postnatal day 4 predicted the occurrence of later complications that required glucocorticoid administration during the neonatal period. No gene polymorphism was detected within the GR promoter region analyzed.

**Conclusions:** Although further large-scale studies are needed to detect the environmental factors that explain the difference in epigenetic modification among infants after birth, our data show that the postnatal environment influences epigenetic programming of GR expression through methylation of the GR gene promoter in premature infants, which may result in relative glucocorticoid insufficiency during the postnatal period.

### Strengths and limitations of the study

- Postnatal environment resets the epigenetic modification of GR gene promoter during four days after birth in preterm infants.
- This epigenetic modification may result in relative glucocorticoid insufficiency during the postnatal period.
- Large-scale studies will be expected to clarify the environmental factors that explain the difference in epigenetic modification among infants after birth.

## Introduction

Many human and animal studies have documented the impact of early life experiences on the neurobiological regulation of stress responsiveness, mood, and anxiety disorders [1–4]. Maternal care, familial functioning, and childhood adversity all contribute to neurobiological regulation through epigenetic modification of DNA, which is thought to be highly stable across a lifespan [5–7]. Hippocampal glucocorticoid receptors (GRs) play a central role in modulating hypothalamus pituitary adrenal (HPA) axis activity [8–10]. Exon 1-F of the human GR gene is similar to rat exons 1–7, which is related to a maternal effect on cytosine methylation and expression [11]. Several human studies have reported a relationship between early life experience and epigenetic modification of the GR 1-F promoter region [11–16]. These studies have shown that adverse early life experiences, such as maternal depression in the third trimester, disruption of adequate nurturing, and history of childhood abuse, are associated with increased methylation of the GR promoter in leukocytes [12–15], the hippocampus [11], and the placenta [16].

The stress of birth exceeds that of any other critical life event. Indeed, exposure to preterm labor and postnatal environmental stress, including the requisite acute care and prolonged physical separation under neonatal intensive care, may be the most adverse

1  
2  
3  
4  
5  
6 environments during early life. Preterm birth is associated with significant long-term  
7  
8  
9 neurodevelopmental impairments [17-21].

10  
11 Increased methylation of the GR promoter in leukocytes may lead to down regulation of  
12  
13 cell surface GR expression that, in turn, results in glucocorticoid receptor resistance  
14  
15 (GCR). GCR refers to a decrease in the sensitivity of immune cells to glucocorticoid  
16  
17 hormones that normally terminate the inflammatory response [22-24]. Evidence for  
18  
19 GCR in response to prolonged stress has been found in humans, such as families of  
20  
21 patients with cancer or those reporting high levels of loneliness [25-27]. On the other  
22  
23 hand, relative adrenal insufficiency occurs when the HPA axis produces insufficient  
24  
25 cortisol relative to the degree of illness or stress. Several studies have reported a  
26  
27 relative adrenal insufficiency in infants who develop chronic lung disease (CLD)  
28  
29 [28,29] and cardiovascular instability [30-32] including late onset circulatory collapse  
30  
31 (LCC). LCC is thought to be caused by late-onset adrenal insufficiency. An  
32  
33 endocrinological study noted that even though relative glucocorticoid insufficiency in  
34  
35 preterm infants is an underlying factor contributing to LCC, cortisol concentrations did  
36  
37 not differ between the LCC and control infant groups [33,34]. Therefore, another  
38  
39 factor(s), including GCR, may be the cause of LCC.  
40  
41  
42  
43  
44  
45  
46  
47  
48  
49  
50  
51  
52  
53

54  
55 To test the hypothesis that an increase in cytosine methylation within the GR promoter  
56  
57  
58  
59  
60

1  
2  
3  
4  
5  
6 during the perinatal period in preterm infants causes physiological impairment in later  
7  
8  
9 life, we first compared epigenetic differences in the leukocyte GR promoter 1-F region  
10  
11 (containing 33 CpG sites ranging from -3479 bp to -3259 bp upstream of the ATG start  
12  
13 site) between healthy term and preterm infants on day 0 of birth and postnatal day 4.  
14  
15  
16 Furthermore, we examined the relationship between the postnatal change in the  
17  
18 methylation rates and perinatal parameters and whether the methylation status on  
19  
20 postnatal day 4 caused complications in the neonatal period, such as CLD and LCC,  
21  
22  
23 which are thought to be caused by relative adrenal insufficiency.  
24  
25  
26  
27  
28  
29  
30  
31  
32  
33  
34  
35  
36  
37  
38  
39  
40  
41  
42  
43  
44  
45  
46  
47  
48  
49  
50  
51  
52  
53  
54  
55  
56  
57  
58  
59  
60



## Methods

### *Prospective cohort study*

Our study was approved by the Juntendo University Urayasu Hospital Research Ethics Board, and the parents provided informed consent. We recruited a cohort of 40 consecutive infants (20 term and 20 preterm) on the day of birth between April and October 2012 at our hospital. Eligible term infants were born within 37–41 weeks of gestation and received routine postnatal care as follows: day 0, skin to skin contact for 30 min from 30 min after birth; day 1, nursing four times (vaginal delivery (VD)) or one time (Caesarean section (C/S)); day 2, rooming with the baby (VD), nursing one time (C/S); day 3, rooming with the baby (VD), nursing six times (C/S); day 4, discharge (VD), rooming with the baby (C/S); day 5, rooming with the baby (C/S); day 6, discharge (C/S)

An infant was defined as preterm if born before week 37 of gestation and admitted to the neonatal intensive care unit (NICU) as premature. Patients born before 37 weeks of gestation and who did not require admission to the NICU were excluded. All preterm infants in our study were exposed to maternal separation for at least 4 days after birth. Small for gestational age (SGA) was defined as weight below the 10<sup>th</sup> percentile for

1  
2  
3  
4  
5  
6 gestational age. The criteria for CLD were the need for additional oxygen after 28 days  
7  
8  
9 of age [35]. The criteria for LCC were (1) sudden systemic hypotension (mean arterial  
10  
11  
12 pressure < 35 mm Hg sustained for at least 3 h); (2) oliguria (< 1 ml kg<sup>-1</sup> h<sup>-1</sup> during an  
13  
14  
15 8-h interval); (3) electrolyte abnormality (hyponatremia < 130 mEqL<sup>-1</sup>, hyperkalemia >  
16  
17  
18 5.5 mEqL<sup>-1</sup>); and (4) excess body weight gain per day (15 gkg<sup>-1</sup> per day or 1.5% per  
19  
20  
21 day). When more than two of these symptoms were detected 7 or more days postnatally,  
22  
23  
24 and after all other common conditions causing systemic hypotension and oliguria, such  
25  
26  
27 as hypovolemia, dehydration, symptomatic patent ductus arteriosus, and sepsis were  
28  
29  
30 ruled out, corticosteroid treatment was started. LCC was diagnosed once the infant  
31  
32  
33 responded to corticosteroid therapy. Daily changes in body weight, mean arterial  
34  
35  
36 pressure, serum sodium and potassium concentrations, and urine output before and at  
37  
38  
39 symptom onset were also assessed to help the attending physician make the diagnosis of  
40  
41  
42 LCC [34].  
43  
44  
45

#### 46 47 *Methylation analysis*

48  
49  
50 Peripheral blood was obtained from the umbilical cord (day 0) or peripheral vein (day  
51  
52  
53 4) from each infant and stored at -80°C until use. Blood was sampled at day 4 in term  
54  
55  
56 infants in conjunction with a metabolic screening test recommended for all infants born  
57  
58  
59  
60

1  
2  
3  
4  
5  
6 in Japan. According to the manufacture's instruction, genomic DNA was extracted from  
7  
8  
9 2  $\mu\text{L}$  of frozen peripheral blood and bisulfite treated using an EZ DNA Methylation  
10  
11 Direct Kit (Zymo Research Corp., Irvine, CA, USA); 1  $\mu\text{L}$  of the resulting 10  $\mu\text{L}$   
12  
13 bisulfite-treated genomic DNA solution was then subjected to polymerase chain  
14  
15 reaction (PCR) to amplify the GR promoter 1-F region, as described previously [11].  
16  
17  
18 The Mquant method described by Leakey et al. was used to calculate the GR promoter  
19  
20 methylation rate [36] (see Supplemental Methods).  
21  
22  
23  
24  
25  
26  
27  
28

### 29 *Statistical analysis*

30  
31  
32 We performed Wilcoxon's signed-rank test to evaluate the longitudinal difference  
33  
34 between days 0 and 4 after birth in preterm and term group infants. We performed the  
35  
36 Mann–Whitney *U*-test to compare the methylation rates in the preterm and term groups  
37  
38 at each CpG site. We performed the chi-square tests (for gestational age, birth weight,  
39  
40 and Apgar score (at 1 and 5 minutes)), and Mann–Whitney *U*-tests (for intrauterine  
41  
42 growth retardation, Caesarean section delivery, respiratory distress, mechanical  
43  
44 ventilation, intracranial hemorrhage, bacterial infection, and antenatal steroid  
45  
46 administration) to compare the characteristics of each group of infants as shown in  
47  
48  
49  
50  
51  
52  
53  
54  
55  
56  
57  
58  
59  
60  
61  
62  
63  
64  
65  
66  
67  
68  
69  
70  
71  
72  
73  
74  
75  
76  
77  
78  
79  
80  
81  
82  
83  
84  
85  
86  
87  
88  
89  
90  
91  
92  
93  
94  
95  
96  
97  
98  
99  
100  
101  
102  
103  
104  
105  
106  
107  
108  
109  
110  
111  
112  
113  
114  
115  
116  
117  
118  
119  
120  
121  
122  
123  
124  
125  
126  
127  
128  
129  
130  
131  
132  
133  
134  
135  
136  
137  
138  
139  
140  
141  
142  
143  
144  
145  
146  
147  
148  
149  
150  
151  
152  
153  
154  
155  
156  
157  
158  
159  
160  
161  
162  
163  
164  
165  
166  
167  
168  
169  
170  
171  
172  
173  
174  
175  
176  
177  
178  
179  
180  
181  
182  
183  
184  
185  
186  
187  
188  
189  
190  
191  
192  
193  
194  
195  
196  
197  
198  
199  
200  
201  
202  
203  
204  
205  
206  
207  
208  
209  
210  
211  
212  
213  
214  
215  
216  
217  
218  
219  
220  
221  
222  
223  
224  
225  
226  
227  
228  
229  
230  
231  
232  
233  
234  
235  
236  
237  
238  
239  
240  
241  
242  
243  
244  
245  
246  
247  
248  
249  
250  
251  
252  
253  
254  
255  
256  
257  
258  
259  
260  
261  
262  
263  
264  
265  
266  
267  
268  
269  
270  
271  
272  
273  
274  
275  
276  
277  
278  
279  
280  
281  
282  
283  
284  
285  
286  
287  
288  
289  
290  
291  
292  
293  
294  
295  
296  
297  
298  
299  
300  
301  
302  
303  
304  
305  
306  
307  
308  
309  
310  
311  
312  
313  
314  
315  
316  
317  
318  
319  
320  
321  
322  
323  
324  
325  
326  
327  
328  
329  
330  
331  
332  
333  
334  
335  
336  
337  
338  
339  
340  
341  
342  
343  
344  
345  
346  
347  
348  
349  
350  
351  
352  
353  
354  
355  
356  
357  
358  
359  
360  
361  
362  
363  
364  
365  
366  
367  
368  
369  
370  
371  
372  
373  
374  
375  
376  
377  
378  
379  
380  
381  
382  
383  
384  
385  
386  
387  
388  
389  
390  
391  
392  
393  
394  
395  
396  
397  
398  
399  
400  
401  
402  
403  
404  
405  
406  
407  
408  
409  
410  
411  
412  
413  
414  
415  
416  
417  
418  
419  
420  
421  
422  
423  
424  
425  
426  
427  
428  
429  
430  
431  
432  
433  
434  
435  
436  
437  
438  
439  
440  
441  
442  
443  
444  
445  
446  
447  
448  
449  
450  
451  
452  
453  
454  
455  
456  
457  
458  
459  
460  
461  
462  
463  
464  
465  
466  
467  
468  
469  
470  
471  
472  
473  
474  
475  
476  
477  
478  
479  
480  
481  
482  
483  
484  
485  
486  
487  
488  
489  
490  
491  
492  
493  
494  
495  
496  
497  
498  
499  
500  
501  
502  
503  
504  
505  
506  
507  
508  
509  
510  
511  
512  
513  
514  
515  
516  
517  
518  
519  
520  
521  
522  
523  
524  
525  
526  
527  
528  
529  
530  
531  
532  
533  
534  
535  
536  
537  
538  
539  
540  
541  
542  
543  
544  
545  
546  
547  
548  
549  
550  
551  
552  
553  
554  
555  
556  
557  
558  
559  
560  
561  
562  
563  
564  
565  
566  
567  
568  
569  
570  
571  
572  
573  
574  
575  
576  
577  
578  
579  
580  
581  
582  
583  
584  
585  
586  
587  
588  
589  
590  
591  
592  
593  
594  
595  
596  
597  
598  
599  
600  
601  
602  
603  
604  
605  
606  
607  
608  
609  
610  
611  
612  
613  
614  
615  
616  
617  
618  
619  
620  
621  
622  
623  
624  
625  
626  
627  
628  
629  
630  
631  
632  
633  
634  
635  
636  
637  
638  
639  
640  
641  
642  
643  
644  
645  
646  
647  
648  
649  
650  
651  
652  
653  
654  
655  
656  
657  
658  
659  
660  
661  
662  
663  
664  
665  
666  
667  
668  
669  
670  
671  
672  
673  
674  
675  
676  
677  
678  
679  
680  
681  
682  
683  
684  
685  
686  
687  
688  
689  
690  
691  
692  
693  
694  
695  
696  
697  
698  
699  
700  
701  
702  
703  
704  
705  
706  
707  
708  
709  
710  
711  
712  
713  
714  
715  
716  
717  
718  
719  
720  
721  
722  
723  
724  
725  
726  
727  
728  
729  
730  
731  
732  
733  
734  
735  
736  
737  
738  
739  
740  
741  
742  
743  
744  
745  
746  
747  
748  
749  
750  
751  
752  
753  
754  
755  
756  
757  
758  
759  
760  
761  
762  
763  
764  
765  
766  
767  
768  
769  
770  
771  
772  
773  
774  
775  
776  
777  
778  
779  
780  
781  
782  
783  
784  
785  
786  
787  
788  
789  
790  
791  
792  
793  
794  
795  
796  
797  
798  
799  
800  
801  
802  
803  
804  
805  
806  
807  
808  
809  
810  
811  
812  
813  
814  
815  
816  
817  
818  
819  
820  
821  
822  
823  
824  
825  
826  
827  
828  
829  
830  
831  
832  
833  
834  
835  
836  
837  
838  
839  
840  
841  
842  
843  
844  
845  
846  
847  
848  
849  
850  
851  
852  
853  
854  
855  
856  
857  
858  
859  
860  
861  
862  
863  
864  
865  
866  
867  
868  
869  
870  
871  
872  
873  
874  
875  
876  
877  
878  
879  
880  
881  
882  
883  
884  
885  
886  
887  
888  
889  
890  
891  
892  
893  
894  
895  
896  
897  
898  
899  
900  
901  
902  
903  
904  
905  
906  
907  
908  
909  
910  
911  
912  
913  
914  
915  
916  
917  
918  
919  
920  
921  
922  
923  
924  
925  
926  
927  
928  
929  
930  
931  
932  
933  
934  
935  
936  
937  
938  
939  
940  
941  
942  
943  
944  
945  
946  
947  
948  
949  
950  
951  
952  
953  
954  
955  
956  
957  
958  
959  
960  
961  
962  
963  
964  
965  
966  
967  
968  
969  
970  
971  
972  
973  
974  
975  
976  
977  
978  
979  
980  
981  
982  
983  
984  
985  
986  
987  
988  
989  
990  
991  
992  
993  
994  
995  
996  
997  
998  
999  
1000

1  
2  
3  
4  
5  
6 relationships of the increased ratio of methylation rates as a dependent variable, with the  
7  
8 perinatal parameters in preterm infants as independent variables. To perform this  
9  
10 stepwise multiple regression analysis, several nominal variables were converted to  
11  
12 categorical variables by grouping values into two categories. The adjusted coefficient  
13  
14 of determination ( $R^2$ ) is the fraction of information of the dependent variable that is  
15  
16 explained by the independent variables. Logistic regression analysis was performed to  
17  
18 investigate the relationships between the methylation rate at 4 days as a dependent  
19  
20 variable with later complications in the neonatal period as independent variables. The  
21  
22 goodness of fit of the logistic regression models was assessed using Pearson residuals.  
23  
24 The pseudo- $R^2$  is the fraction of information of the dependent variable that is explained  
25  
26 by the independent variables [37]. We used the likelihood ratio test to test the hypothesis  
27  
28 regarding which dependent variable is significantly better among the four CpGs. A  $p$ -  
29  
30 value  $< 0.05$  (two-tailed) was considered significant. All statistical analyses were  
31  
32 carried out using the StatView R 5.0J for Windows (SAS Institute, Cary, NC, USA)  
33  
34 software package.  
35  
36  
37  
38  
39  
40  
41  
42  
43  
44  
45  
46  
47  
48  
49  
50  
51  
52  
53  
54  
55  
56  
57  
58  
59  
60

## Results

### *Participant characteristics*

Thirty-nine of the 40 participants completed the analysis. Bisulfite-treated genomic DNA from one infant from the preterm group could not be amplified by PCR for unknown reasons. The characteristics of the infants are shown in Table 1. Ten of 19 preterm infants received antenatal steroids. The preterm infants had higher rates of intrauterine growth retardation than that of infants delivered by Caesarean section. They had lower Apgar scores at 1 min and 5 min compared with those of term infants. Preterm infants displayed higher rates of respiratory distress and required mechanical ventilation more frequently during the postnatal period than did term infants. None of the infants experienced a bacterial infection or intracranial hemorrhage through postnatal day 4. No gene polymorphism was detected within the GR promoter region analyzed.

### *Longitudinal changes in methylation status*

We examined 33 CpG sites in the GR 1-F promoter. In preterm infants, methylation rates significantly increased between birth and postnatal day 4 at 11 CpG sites (1,  $p =$

1  
2  
3  
4  
5  
6 0.022; 2,  $p = 0.044$ ; 8,  $p = 0.00029$ ; 9,  $p = 0.049$ ; 10,  $p = 0.044$ ; 14,  $p = 0.0013$ ; 16,  $p =$   
7  
8  
9 0.0022; 25,  $p = 0.036$ ; 26,  $p = 0.049$ ; 28,  $p = 0.00097$ ; 29,  $p = 0.016$ ) and significantly  
10  
11 decreased at one CpG site (4,  $p = 0.030$ ). In contrast, methylation rates between birth  
12  
13 and postnatal day 4 were stable in term infants (Figure 1).  
14  
15

#### 16 17 18 19 20 *Cross-sectional differences in methylation status* 21

22  
23 Methylation rates in preterm infants at birth were lower at three CpG sites (1;  $p = 0.033$ ,  
24  
25 5;  $p = 0.0024$ , 8;  $p = 0.0001$ ) and higher at one site (4;  $p = 0.040$ ) compared with those  
26  
27 in term infants. Methylation rates on postnatal day 4 were significantly higher in  
28  
29 preterm infants compared with term infants at seven CpG sites (15,  $p = 0.00061$ ; 16,  $p =$   
30  
31 0.0083; 21,  $p = 0.043$ ; 25,  $p = 0.0098$ ; 26,  $p = 0.0050$ ; 27,  $p = 0.00040$ ; 28,  $p = 0.038$ ).  
32  
33  
34

35  
36  
37 Methylation rates in preterm infants were not lower than those of term infants at any  
38  
39 CpG site (Figure 2).  
40  
41

42  
43 Figure 3 shows the changes in methylation status in each group between birth and  
44  
45 postnatal day 4 at CpG sites 16, 25, 26, and 28. Methylation rates at these sites  
46  
47 significantly increased only in preterm infants, resulting in a significantly higher  
48  
49 methylation rate in preterm than in term infants on postnatal day 4.  
50  
51  
52  
53  
54  
55  
56  
57  
58  
59  
60

1  
2  
3  
4  
5  
6 *Relationship between methylation rates at birth and perinatal parameters*  
7

8  
9 We analyzed the relationship between the methylation rates at birth at CpG sites 1, 4, 5,  
10  
11 and 8 and prenatal parameters such as gestational age, birth weight, SGA, antenatal  
12  
13 steroid administration, and mode of delivery. We found no significant correlation among  
14  
15  
16  
17  
18 them.  
19

20  
21  
22  
23 *Relationship between the increase in the methylation rate ratio and perinatal*  
24  
25  
26  
27 *parameters*  
28

29 To examine the relationship between the increased methylation rate ratio and perinatal  
30  
31 parameters, we chose 12 CpG sites (1, 2, 4, 8, 9, 10, 14, 16, 25, 26, 28, and 29) in which  
32  
33 the methylation rates were significantly increased (with the exception of CpG4), and  
34  
35 calculated the ratio as the methylation rate at day 4 divided by that at day 0. Then we  
36  
37 investigated the relationship between the change in ratio at each CpG site and the  
38  
39 perinatal parameters of gestational age, birth weight, Apgar score, mode of delivery,  
40  
41  
42  
43  
44  
45  
46  
47  
48 SGA, respiratory distress syndrome (RDS), mechanical ventilation, antenatal steroid  
49  
50 administration, and admission to the NICU. We found associations between these  
51  
52 parameters and an increase in the methylation rate ratio at CpG4, CpG8, CpG10,  
53  
54  
55  
56  
57  
58  
59  
60 CpG25, and CpG29. The change in methylation ratio at each CpG site was associated

1  
2  
3  
4  
5  
6 with following perinatal parameters in the parenthesis: CpG4 (gestational age and Apgar  
7 score at 1 min [regression coefficient = 0.029 and -0.085, respectively; overall  $p$ -value =  
8 0.004; adjusted- $R^2$  = 0.223]); CpG8 (SGA, Caesarean section, Apgar score at 5 min, and  
9 NICU admission [regression coefficient = 0.43, -0.31, 0.16, and 0.79, respectively;  
10 overall  $p$ -value < 0.0001; adjusted- $R^2$  = 0.573]); CpG10 (NICU admission [regression  
11 coefficient = 0.29; overall  $p$ -value = 0.037; adjusted- $R^2$  = 0.089]); CpG25 (SGA  
12 [regression coefficient = 0.86, overall  $p$ -value = 0.009, adjusted- $R^2$  = 0.15]); and CpG29  
13 (SGA [regression coefficient = 0.096, overall  $p$ -value = 0.039, adjusted- $R^2$  = 0.086]),  
14 respectively.  
15  
16  
17  
18  
19  
20  
21  
22  
23  
24  
25  
26  
27  
28  
29  
30  
31  
32  
33  
34

35 *Relationship between methylation rate at postnatal day 4 and complications during the*  
36 *neonatal period*  
37  
38

39  
40 We chose four CpG sites (16, 25, 26, and 28) shown in Figure 3 to investigate the  
41 relationship between methylation status on postnatal day 4 and complications during the  
42 perinatal period. Then, we analyzed the relationship between the methylation rate at  
43 these CpG sites on postnatal day 4 and subsequent complications. There were four  
44 preterm infants who had some complications and needed glucocorticoid administration  
45 during the neonatal period. (CLD;  $n=3$ , LCC;  $n=3$ ) Except for these four cases, no  
46  
47  
48  
49  
50  
51  
52  
53  
54  
55  
56  
57  
58  
59  
60



1  
2  
3  
4  
5  
6 infant received glucocorticoid therapy postnatally.  
7

8  
9 The logistic regression models were statistically fit (Pearson residuals,  $\chi^2 = 19.284$ ,  $p =$   
10  
11 0.9799, pseudo- $R^2 = 0.429$ ). CpG16 had a significantly better explanatory factor among  
12  
13 four CpGs (likelihood ratio test  $\chi^2 = 3.889$ ,  $p = 0.0486$ ).  
14  
15  
16  
17  
18  
19  
20  
21  
22  
23  
24  
25  
26  
27  
28  
29  
30  
31  
32  
33  
34  
35  
36  
37  
38  
39  
40  
41  
42  
43  
44  
45  
46  
47  
48  
49  
50  
51  
52  
53  
54  
55  
56  
57  
58  
59  
60

## Discussion

Our study is the first longitudinal analysis of GR promoter methylation in humans during the perinatal period, the stage that is thought to be the most susceptible to epigenetic regulation. The present study demonstrated that postnatal exposure to an adverse environment in preterm infants influences epigenetic programming of the glucocorticoid response via GR promoter methylation during the neonatal period.

We found that perinatal parameters such as gestational age, intrauterine growth, Apgar score, and mode of delivery were predictors for changes in methylation rates at CpG sites in the GR promoter as well as NICU admission.

It should be noted that gestational age was positively associated with an increase in the methylation ratio at CpG4. Exposure to preterm labor may be an adverse environment in early life. Therefore, the methylation rate ratio at CpG4 should be negatively associated with gestational age. CpG4 was the only site at which the methylation rates in preterm infants were significantly higher than those in term infants at birth. Moreover, CpG4 was the only site at which the methylation rate was lower on postnatal day 4 than on day 0. Taken together, the change in methylation at CpG4 seemed to be regulated inversely, compared with other CpG sites. The mechanisms underlying DNA methylation and demethylation probably develop due to unfavorable experiences during

1  
2  
3  
4  
5  
6 early life; however, recent studies that have investigated other transcripts of the GR  
7  
8  
9 gene have proposed a more complex child maltreatment-induced DNA methylation  
10  
11 model than previously described for exon 1-F [38]. In the present study, CpG4 may be a  
12  
13 transcriptionally silent methylation site that mediated aberrant epigenetic regulation, as  
14  
15 proposed by Lutz et al [38]. Low Apgar score, which is thought to be an unfavorable  
16  
17 experience during the perinatal period, is positively associated with the CpG4  
18  
19 methylation ratio increase and negatively associated with that of CpG8. Thus, low  
20  
21 Apgar score may have a negative effect on methylation in most CpG sites in the GR 1-F  
22  
23 promoter. One possible explanation is that low Apgar score indicates an adverse  
24  
25 condition of cardiopulmonary function, which, in turn, inactivates the enzymatic  
26  
27 cascade for DNA methylation. Stable oxygen and energy supplements may be necessary  
28  
29 to open the window for epigenetic programming by DNA methylation. Caesarean  
30  
31 section delivery was negatively associated with an increase in the methylation ratio at  
32  
33 CpG8. This obstetrical intervention may partially reduce stress-induced epigenetic  
34  
35 programming of the GR promoter. SGA was positively associated with an increase in  
36  
37 methylation rate ratio at CpG8, 25, and 29. The intrauterine environment, like the  
38  
39 postnatal environment, can affect fetal epigenetic modification of DNA. SGA infants  
40  
41 have been thought to demonstrate epigenomic dysregulation, which mediates the long-  
42  
43  
44  
45  
46  
47  
48  
49  
50  
51  
52  
53  
54  
55  
56  
57  
58  
59  
60

1  
2  
3  
4  
5  
6 term consequences of intrauterine growth restriction at birth [39,40]. The present study  
7  
8  
9 showed that, in the GR gene, SGA might influence the infant's susceptibility to the  
10  
11  
12 postnatal environment rather than epigenomic dysregulation at birth. As we expected,  
13  
14  
15 NICU admission followed by maternal separation was positively associated with an  
16  
17  
18 increase in the methylation rate ratio at CpG8 and 10. Taken together, we could  
19  
20  
21 approximately estimate the relationship between perinatal parameters and changes in  
22  
23  
24 methylation rates at CpG sites in the GR promoter. Further precise analysis should give  
25  
26  
27 insights into the host-environment interaction.

28  
29 Four preterm infants needed glucocorticoid administration during the postnatal period  
30  
31  
32 due to CLD or LCC. The logistic regression models were statistically fit to predict the  
33  
34  
35 development of these complications (CLD and LCC), which were thought to be partly  
36  
37  
38 related to relative adrenal insufficiency. CpG16 had a significantly better explanatory  
39  
40  
41 factor among the four CpGs in which methylation rates increased significantly only in  
42  
43  
44 preterm infants resulting in a significantly higher methylation rate in preterm than in  
45  
46  
47 term infants on postnatal day 4. CpG16 is a binding site for nerve growth factor  
48  
49  
50 inducible protein A (NGFI-A), which has emerged as a central regulator of early  
51  
52  
53 inflammatory and immune processes and potentiates GR 1-F promoter activity [11,41-  
54  
55  
56 43].  
57  
58  
59  
60

1  
2  
3  
4  
5  
6 Taken together, our results suggest that the high methylation rate observed in leukocyte  
7  
8  
9 GR promoters may result in GR unresponsiveness to early inflammatory stimuli by  
10  
11  
12 NGFI-A, followed by GCR and/or a failure to downregulate inflammatory responses by  
13  
14  
15 glucocorticoids [44].

16  
17  
18 One limitation of our study was the small sample size. Further studies with larger  
19  
20  
21 sample sizes that include patients with chronic inflammation are needed.  
22  
23  
24  
25  
26  
27  
28  
29  
30  
31  
32  
33  
34  
35  
36  
37  
38  
39  
40  
41  
42  
43  
44  
45  
46  
47  
48  
49  
50  
51  
52  
53  
54  
55  
56  
57  
58  
59  
60

## Conclusions

We found marked changes in DNA methylation induced by the postnatal environment during the 4 days immediately after birth. Moreover, the methylation status at postnatal day 4 may predict the development of complications during the neonatal period, which is thought to be induced by relative glucocorticoid insufficiency in preterm infants.

### Contributors

MK and TS conceptualized and designed the study. MK carried out the initial analyses. HY designed the data collection instruments, and coordinated and supervised data collection. HI performed statistical analysis. MK and drafted the initial manuscript, and revised the manuscript. MK, HY, HI, YA and TS approved the final manuscript as submitted.

### Funding

This work was supported in part by Grants-in-Aid for General Scientific Research, Nos. 24659511 (M.K.), 23390389 (Y.A.) and “High-Tech Research Center” Project for Private Universities: matching fund subsidy from the Ministry of Education, Culture, Sports, Science, and Technology, Japan.

### Competing interests

Financial Disclosure: The authors have no financial relationships relevant to this article to disclose. Conflict of Interest: The authors have no conflict of interest to disclose.

### Data sharing

1  
2  
3  
4  
5  
6  
7  
8  
9  
10  
11  
12  
13  
14  
15  
16  
17  
18  
19  
20  
21  
22  
23  
24  
25  
26  
27  
28  
29  
30  
31  
32  
33  
34  
35  
36  
37  
38  
39  
40  
41  
42  
43  
44  
45  
46  
47  
48  
49  
50  
51  
52  
53  
54  
55  
56  
57  
58  
59  
60

No additional data are available.

**Acknowledgements**

The authors express our appreciation to Dr. Satoru Yamaguchi for sample collection.

We are deeply indebted to Drs. Kaoru Obinata and Kenji Takamori for their encouragement throughout the course of this study.

For peer review only



## References

1. Kaufman J, Charney D. Effects of early stress on brain structure and function: Implications for understanding the relationship between child maltreatment and depression. *Dev Psychopathol* 2001;**13**:451.
2. Kessler RC, Davis CG, Kendler KS. Childhood adversity and adult psychiatric disorder in the US National Comorbidity Survey. *Psychol Med* 1997;**27**:1101-1119.
3. Schilling EA, Aseltine RHJr, Gore S. Adverse childhood experiences and mental health in young adults: a longitudinal survey. *BMC Public Health* 2007;**7**:30.
4. De Kloet ER, Joels M, Holsboer F. Stress and brain: from adaptation to disease. *Nat. Rev. Neurosci.* 2005;**6**:463-475.
5. De Bellis MD, Chrousos GP, Dorn LD, et al. Hypothalamic-pituitary-adrenal axis dysregulation in sexually abused girls. *J Clin Endocrinol Metab* 1994;**78**:249-255.
6. Weaver ICG. Epigenetic programming by maternal behavior and pharmacological intervention. Nature versus nurture: let's call the whole thing off. *Epigenetics* 2007;**2**: 22-28.
7. Champagne FA, Curley JP. Epigenetic mechanisms mediating the long-term effects of maternal care on development. *Neurosci Biobehav Rev* 2009;**33**:593-600.

- 1  
2  
3  
4  
5  
6 8. Liu D, Diorio J, Tannenbaum B, et al. Maternal care, hippocampal glucocorticoid  
7  
8 receptors, and hypothalamic-pituitary-adrenal responses to stress. *Science*  
9  
10 1997;**277**:1659-62.  
11  
12  
13  
14 9. Weaver ICG, Cervoni N, Champagne FA, et al. Epigenetic programming by  
15  
16 maternal behavior. *Nat Neurosc.* 2004;**7**:847-854.  
17  
18  
19  
20 10. Boyle MP, Brewer JA, Funatsu M, et al. Acquired deficit of forebrain glucocorticoid  
21  
22 receptor produces depression-like changes in adrenal axis regulation and behavior.  
23  
24 *Proc Natl Acad Sci USA* 2005;**102**:473-478.  
25  
26  
27  
28 11. McGowan PO, Sasaki A, D'Alessio AC, et al. Epigenetic regulation of the  
29  
30 glucocorticoid receptor in human brain associates with childhood abuse. *Nat*  
31  
32 *Neurosci* 2009;**12**:342-348.  
33  
34  
35  
36 12. Oberlander TF, Weinberg J, Papsdorf M, et al. Prenatal exposure to maternal  
37  
38 depression, neonatal methylation of human glucocorticoid receptor gene (*NR3C1*)  
39  
40 and infant cortisol stress responses. *Epigenetics* 2008;**3**:97-106.  
41  
42  
43  
44 13. Tyrka AR, Price LH, Marsit C, et al. Childhood adversity and epigenetic modulation  
45  
46 of the leukocyte glucocorticoid receptor: preliminary findings in healthy adults.  
47  
48 *PloS ONE* 2012;**7**:e30148.  
49  
50  
51  
52 14. Perroud N, Paoloni-Giacobino A, Prada P, et al. Increased methylation of  
53  
54  
55  
56  
57  
58  
59  
60

- 1  
2  
3  
4  
5  
6 glucocorticoid receptor gene (NR3C1) in adults with a history of childhood  
7  
8  
9 maltreatment: a link with the severity and type of trauma. *Transl Psychiatry*  
10  
11  
12 2011;**1**:e59.
- 13  
14  
15 15. Mulligan CJ, D'Errico NC, Stees J, et al. Methylation changes at NR3C1 in  
16  
17 newborns associate with maternal prenatal stress exposure and newborn birth weight.  
18  
19  
20  
21  
22 *Epigenetics* 2012; **7**:853-857.
- 23  
24 16. Bromer C, Marsit CJ, Armstrong DA, et al. Genetic and epigenetic variation of the  
25  
26 glucocorticoid receptor (NR3C1) in placenta and infant neurobehavior. *Dev*  
27  
28  
29  
30  
31 *Psychobiol* 2013;**55**:673-83.
- 32  
33 17. Hack M, Flannery DJ, Schluchter M, et al. Outcomes in young adulthood for very-  
34  
35  
36  
37 low-birth-weight infants. *N Engl J Med* 2002;**346**:149-157.
- 38  
39 18. Marlow N. Neurocognitive outcome after very preterm birth. *Arch Dis Child Fetal*  
40  
41  
42  
43  
44  
45  
46  
47 *Neonatal Ed* 2004;**89**: F224-228.
- 48  
49 19. Aylward GP. Cognitive and neuropsychological outcomes: more than IQ scores.  
50  
51  
52  
53  
54  
55  
56  
57  
58  
59  
60 *Ment Retard Dev Disabil Res Rev* 2002;**8**:234-240.
20. Larroque B, Ancel PY, Marret S, et al. ; EPIPAGE Study Group.  
Neurodevelopmental disabilities and special care of 5-year-old children born before  
33 weeks of gestation (the EPIPAGE study): a longitudinal cohort study. *Lancet*

- 1  
2  
3  
4  
5  
6 2008;**371**:813-820.  
7  
8  
9 21. Hack M. Adult outcomes of preterm children. *J Dev Behav Pediatr* 2009;**30**:460-70.  
10  
11 22. Marques AH, Silverman MN, Sternberg EM. Glucocorticoid dysregulation and their  
12 clinical correlates. From receptors to therapeutics. *Ann NY Acad Sci* 2009;**1179**:1-  
13 18.  
14  
15  
16  
17  
18  
19  
20 23. Stark JL, Avitsur R, Padgett DA, et al. Social stress induces glucocorticoid  
21 resistance in macrophages. *Am J Physiol* 2001;**280**:1799-1805.  
22  
23  
24  
25  
26 24. Silverman MN, Sternberg EM. Glucocorticoid regulation of inflammation and its  
27 functional correlates: from HPA axis to glucocorticoid receptor dysfunction. *Ann NY*  
28 *Acad Sci* 2012;**1261**:55-63.  
29  
30  
31  
32  
33  
34 25. Cole SW. Social regulation of leukocyte homeostasis: The role of glucocorticoid  
35 sensitivity. *Brain Behav Immun* 2008;**22**:1049-1055.  
36  
37  
38  
39  
40 26. Miller GE, Cohen S, Ritchey AK. Chronic psychological stress and the regulation of  
41 pro-inflammatory cytokines: A glucocorticoid-resistance model. *Health Psychol*  
42 2002;**21**:531-541.  
43  
44  
45  
46  
47  
48 27. Miller GE, Chen E, Sze J, et al. A functional genomic fingerprint of chronic stress in  
49 humans: blunted glucocorticoid and increased NF-kappaB signaling. *Biol Psychiatry*  
50 2008;**64**:266-272.  
51  
52  
53  
54  
55  
56  
57  
58  
59  
60

- 1  
2  
3  
4  
5  
6 28. Watterberg KL, Scott SM. Evidence of early adrenal insufficiency in babies who  
7  
8  
9 develop bronchopulmonary dysplasia. *Pediatrics* 1995;**95**:120-125.  
10  
11  
12 29. Watterberg KL, Gerdes JS, Cole CH, et al. Prophylaxis of early adrenal  
13  
14 insufficiency to prevent bronchopulmonary dysplasia: a multicenter trial. *Pediatrics*  
15  
16 2004;**114**:1649-1657.  
17  
18  
19  
20 30. Ng PC, Lam CW, Fok TF, et al. Refractory hypotension in preterm infants with  
21  
22 adrenocortical insufficiency. *Arch Dis Child Fetal Neonatal Ed* 2001;**84**:F122-F124.  
23  
24  
25  
26 31. Arnold JD, Bonacruz G, Leslie GI, et al. Antenatal glucocorticoids modulate the  
27  
28 amplitude of pulsatile cortisol secretion in premature neonates. *Pediatr Res*  
29  
30 1998;**44**:876-881.  
31  
32  
33  
34  
35 32. Yoder B, Martin H, McCurnin DC, et al. Impaired urinary cortisol excretion and  
36  
37 early cardiopulmonary dysfunction in immature baboon. *Pediatr Res* 2002;**51**:426-  
38  
39 432.  
40  
41  
42  
43 33. Masumoto K, Kusuda S, Aoyagi H, et al. Comparison of serum cortisol  
44  
45 concentrations in preterm infants with or without late-onset circulatory collapse due  
46  
47 to adrenal insufficiency of prematurity. *Pediatr Res* 2008;**63**:686-690.  
48  
49  
50  
51  
52 34. Nakanishi H, Yamanaka S, Koriyama T, et al. Clinical characterization and long-  
53  
54 term prognosis of neurological development in preterm infants with late-onset-  
55  
56  
57  
58  
59  
60

- 1  
2  
3  
4  
5  
6 circulatory collapse. *J perinatol* 2010;**30**:751-756.  
7  
8  
9 35. Jobe AH, Bancalari E. Bronchopulmonary dysplasia. *Am J Respir Crit Care Med*  
10  
11 2001;**163**:1723-9.  
12  
13  
14 36. Leakey TI, Zielinski J, Siegfried RN, et al. A simple algorithm for quantifying DNA  
15  
16 methylation levels on multiple independent CpG sites in bisulfite genomic  
17  
18 sequencing electropherograms. *Nucleic Acids Res* 2008;**36**:e64.  
19  
20  
21  
22  
23 37. Cameron AC, Windmeijer FAG. An R-squared measured of goodness of fit for some  
24  
25 common nonlinear regression models. *Journal of Econometrics* 1997;**77**:329-342.  
26  
27  
28  
29 38. Lutz PE, Turecki G. DNA methylation and childhood maltreatment: from animal  
30  
31 models to human studies. *Neuroscience* 2013;**7**:in press.  
32  
33  
34  
35 39. Godfrey KM, Lillycrop KA, Burdge GC, et al. Epigenetic mechanisms and the  
36  
37 mismatch concept of the developmental origins of health and disease. *Pediatric*  
38  
39 *Research* 2007; **61**:5R-10R.  
40  
41  
42  
43 40. Einstein F, Thompson RF, Bhagat TD, et al. Cytosine methylation dysregulation in  
44  
45 neonates following intrauterine growth restriction. *PLoS One* 2010;**5**:e8887.  
46  
47  
48  
49 41. Weaver ICG, D'Alessio AC, Brown SE, et al. The transcription factor nerve growth  
50  
51 factor - inducible protein A mediates epigenetic programming: altering epigenetic  
52  
53 marks by immediate - early genes. *J Neurosci* 2007;**27**:1756-1768.  
54  
55  
56  
57  
58  
59  
60

- 1  
2  
3  
4  
5  
6 42. Cullen EM, Brazil JC, O'Connor CM. Mature human neutrophils constitutively  
7  
8  
9 express the transcription factor EGR-1. *Mol Immunol* 2010;**47**:1701-9.  
10  
11  
12 43. Seiler MP, Mathew R, Liszewski MK, et al. Elevated and sustained expression of  
13  
14 the transcription factors Egr1 and Egr2 controls NKT lineage differentiation in  
15  
16 response to TCR signaling. *Nature Immunol* 2012;**13**:264-271.  
17  
18  
19  
20 44. Cohen S, Janicki-Deverts D, Doyle WJ, et al. Chronic stress, glucocorticoid receptor  
21  
22 resistance, inflammation, and disease risk. *Proc Natl Acad Sci USA* 2012;**109**:5995-  
23  
24 5999.  
25  
26  
27  
28  
29  
30  
31  
32  
33  
34  
35  
36  
37  
38  
39  
40  
41  
42  
43  
44  
45  
46  
47  
48  
49  
50  
51  
52  
53  
54  
55  
56  
57  
58  
59  
60

## Figure Legends

Figure 1. Longitudinal analysis of the methylation rate of the glucocorticoid receptor (GR) gene promoter in the leukocyte calculated using the Mquant method.

The percentage of methylation at each CpG site (mean  $\pm$  SEM) in the GR promoter isolated in peripheral blood collected from term and preterm infants at birth (dark gray bar) and postnatal day 4 (light gray bar), respectively. Wilcoxon's signed-rank test was performed to compare the methylation rate on day 0 and day 4 at each CpG site. A *p*-value  $<0.05$  (two tailed) was considered statistically significant.

Closed star symbol, significant increase in methylation rate; Open star symbol, significant decrease in methylation rate. No significant changes in methylation rate between postnatal days 0 and 4 were observed in term infants.

Figure 2. Cross-sectional analysis of the methylation rates of the glucocorticoid receptor (GR) gene promoter in leukocytes determined using the Mquant method

Percentage of methylation at each CpG site (mean  $\pm$  SEM) in the GR promoter isolated from peripheral blood collected at birth and on postnatal day 4 in term (dark gray bar) and preterm (light gray bar) infants, respectively. Mann-Whitney *U*-tests were performed to compare the methylation rates in preterm and term infants at each CpG site. A *p*-value  $<0.05$  (two tailed) was considered statistically significant.

Closed star symbol, methylation rate significantly higher in preterm compared to term infants; Open star symbol, methylation rate significantly lower in preterm compared to term infants.

Figure 3. Change in methylation status between birth and postnatal day 4 at CpG sites 16, 25, 26, and 28. Methylation rates at these sites were significantly greater in preterm than in term infants resulting in a significantly higher methylation rate ratio in the preterm infants on postnatal day 4. The day 0 and day 4 methylation rate ratios were compared using Wilcoxon's signed-rank test. The Mann-Whitney *U*-test was performed to compare the methylation rates in preterm infants with those in term infants. ns, not significant.



|                                             | <b>Preterm<br/>(n=19)</b> | <b>Term<br/>(n=20)</b> | <b><i>p</i> value<br/>(preterm<br/>vs term)</b> |
|---------------------------------------------|---------------------------|------------------------|-------------------------------------------------|
| <b>Gestational age (weeks) (Mean ± SD)</b>  | <b>30.8 ± 3.2</b>         | <b>39.8 ± 1.3</b>      | <b>&lt;0.001</b>                                |
| <b>Birth weight (g) (Mean ± SD)</b>         | <b>1431 ± 605</b>         | <b>3076 ± 271</b>      | <b>&lt;0.001</b>                                |
| <b>Intrauterine growth retardation (n)</b>  | <b>7</b>                  | <b>1</b>               | <b>0.014</b>                                    |
| <b>Caesarean section delivery (n)</b>       | <b>15</b>                 | <b>3</b>               | <b>&lt;0.001</b>                                |
| <b>Apgar score at 1 min (Mean ± SD)</b>     | <b>6.3 ± 2.6</b>          | <b>9 ± 0</b>           | <b>&lt;0.001</b>                                |
| <b>Apgar score at 5 min (Mean ± SD)</b>     | <b>8.4 ± 1.2</b>          | <b>10 ± 0</b>          | <b>&lt;0.001</b>                                |
| <b>Respiratory distress (n)</b>             | <b>10</b>                 | <b>0</b>               | <b>&lt;0.001</b>                                |
| <b>Mechanical ventilation (n)</b>           | <b>10</b>                 | <b>0</b>               | <b>&lt;0.001</b>                                |
| <b>Intracranial hemorrhage (n)</b>          | <b>0</b>                  | <b>0</b>               | <b>1</b>                                        |
| <b>Bacterial infection (n)</b>              | <b>0</b>                  | <b>0</b>               | <b>1</b>                                        |
| <b>Antenatal steroid administration (n)</b> | <b>10</b>                 | <b>0</b>               | <b>&lt;0.001</b>                                |

**Table1; Participant characteristics**

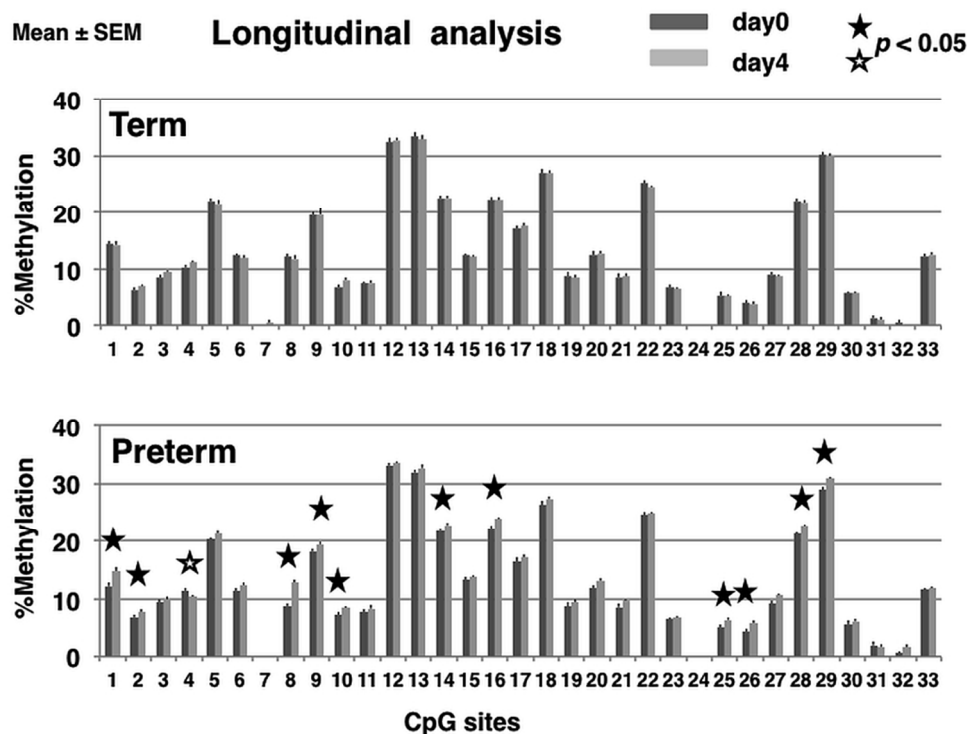

Figure 1. Longitudinal analysis of the methylation rate of the glucocorticoid receptor (GR) gene promoter in the leukocyte calculated using the Mquant method.

The percentage of methylation at each CpG site (mean  $\pm$  SEM) in the GR promoter isolated in peripheral blood collected from term and preterm infants at birth (dark gray bar) and postnatal day 4 (light gray bar), respectively. Wilcoxon's signed-rank test was performed to compare the methylation rate on day 0 and day 4 at each CpG site. A p-value  $< 0.05$  (two tailed) was considered statistically significant.

Closed star symbol, significant increase in methylation rate; Open star symbol, significant decrease in methylation rate. No significant changes in methylation rate between postnatal days 0 and 4 were observed in term infants.

90x67mm (300 x 300 DPI)

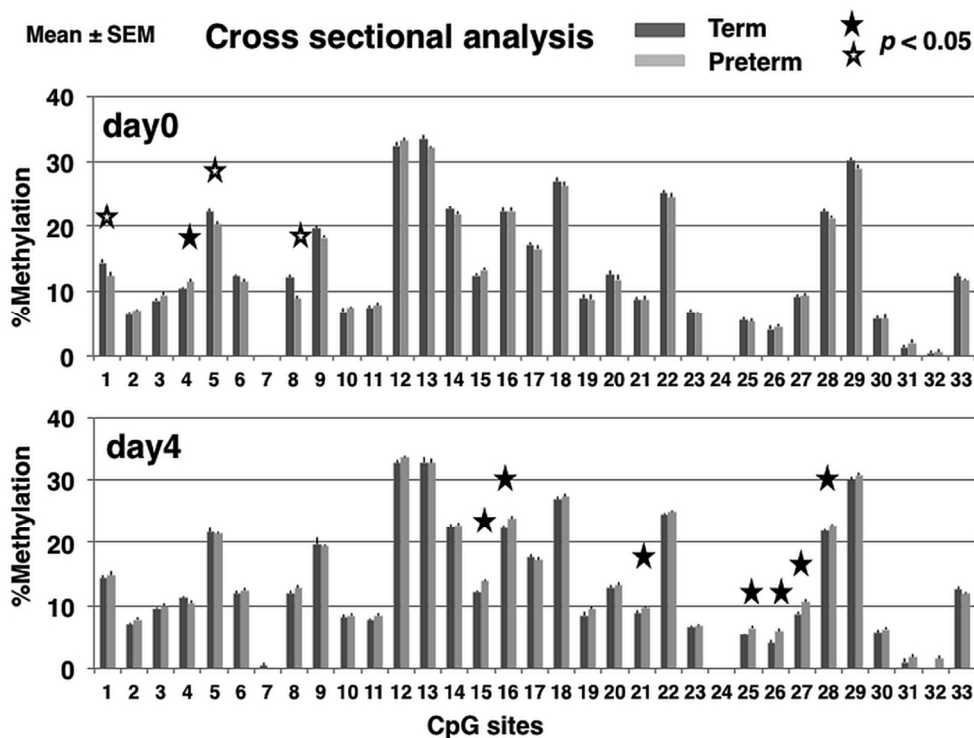

Figure 2. Cross-sectional analysis of the methylation rates of the glucocorticoid receptor (GR) gene promoter in leukocytes determined using the Mquant method

Percentage of methylation at each CpG site (mean ± SEM) in the GR promoter isolated from peripheral blood collected at birth and on postnatal day 4 in term (dark gray bar) and preterm (light gray bar) infants, respectively. Mann-Whitney U-tests were performed to compare the methylation rates in preterm and term infants at each CpG site. A p-value <0.05 (two tailed) was considered statistically significant.

Closed star symbol, methylation rate significantly higher in preterm compared to term infants; Open star symbol, methylation rate significantly lower in preterm compared to term infants.

90x67mm (300 x 300 DPI)

only

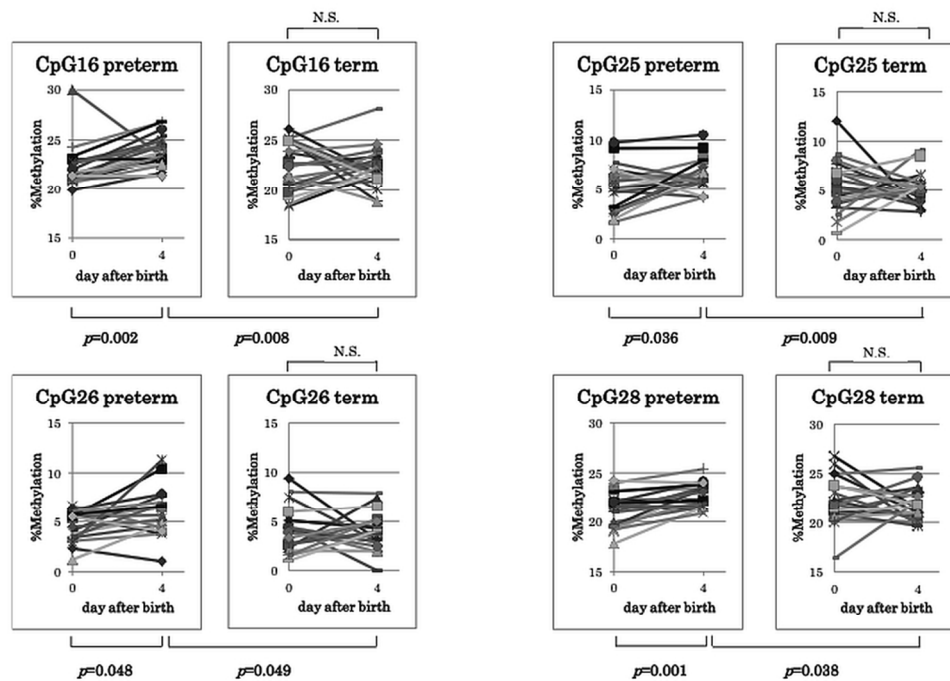

Figure 3. Change in methylation status between birth and postnatal day 4 at CpG sites 16, 25, 26, and 28. Methylation rates at these sites were significantly greater in preterm than in term infants resulting in a significantly higher methylation rate ratio in the preterm infants on postnatal day 4. The day 0 and day 4 methylation rate ratios were compared using Wilcoxon's signed-rank test. The Mann-Whitney U-test was performed to compare the methylation rates in preterm infants with those in term infants. ns, not significant.

90x67mm (300 x 300 DPI)

## Supplemental methods

Primers for PCR were directed against the GR 1-F promoter using the following sequences: sense, 5'- GTG GTG GGG GAT TTG -3'; antisense, 5'- ACC TAA TCT CTC TAA AAC -3'. PCR was performed using a TaKaRa EpiTaq HS DNA polymerase kit (TAKARA BIO Inc., Shiga, Japan). Each 20  $\mu$ L PCR reaction included 1 U Taq polymerase, 0.25 mM dNTP mix, 1.25 mM MgCl<sub>2</sub>, and 1  $\mu$ M each primer. The thermocycler protocol consisted of the following procedure: initial denaturation (5 min, 95°C); 35 cycles of denaturation (1 min, 95°C), annealing (2 min 30 s, 50°C), and extension (1 min, 72°C); and then a final extension (5 min, 72°C) with subsequent cooling to 20°C. The resulting product was separated by 2% agarose gel electrophoresis, and the corresponding 436 bp band was excised and purified using a Min Elute Gel Extraction Kit (QIAGEN N.V. Venlo, Netherlands). The purified product was amplified by nested PCR, using the following primers: sense, 5'- TTT TTG AAG TTT TTT TAG AGG G- 3'; antisense, 5'- AAT TTC TCC AAT TTC TTT TCT C- 3'. The PCR conditions were identical to the initial PCR procedure, with the exception that the annealing temperature was 54.2°C and 3 ng initial PCR product was used as template DNA. Then the product was purified using the same procedure as that used for the initial PCR (the corresponding band was 311 bp), and 20 ng of the resulting product was

1  
2  
3  
4  
5  
6 subjected to direct sequencing (Operon Biotechnology Co., Ltd. Tokyo, Japan) using  
7  
8  
9 antisense 'nested' primer. The ABL files from sequencing were processed using BioEdit  
10  
11  
12 (<http://www.mbio.ncsu.edu/BioEdit/bioedit.html>).

13  
14  
15 To calculate the GR promoter methylation rate, the Mquant method described by  
16  
17  
18 Leakey et al. was used. First, the mean T height (T bar) from an equal number of each  
19  
20  
21 side surrounding the target CpG site was determined in conventional four-dye-trace  
22  
23  
24 direct sequencing electrophoregrams of this PCR product. We used 10 Ts (5 Ts from  
25  
26  
27 each side) around the CpG site. Ts used to calculate the T bar should be at least 10 times  
28  
29  
30 the height of their secondary base (C, G, or A). Second, the height of the T at the target  
31  
32  
33 CpG site was subtracted from T bar to yield delta T. Third, the level of methylation on  
34  
35  
36 the site was calculated as a ratio ( $\Delta T/T$  bar). The calculations were performed  
37  
38  
39 using Excel 2013 (Microsoft, Redmond, WA, USA).  
40  
41  
42  
43  
44  
45  
46  
47  
48  
49  
50  
51  
52  
53  
54  
55  
56  
57  
58  
59  
60
