# Supplementary material for: Postnatal epigenetic modification of glucocorticoid receptor gene in preterm infants: a prospective cohort study
Source: PubMed Central journal article supplement — BMJ Open. 2014 Jul 12;4(7):e005318. doi: 10.1136/bmjopen-2014-005318 (PMC4120337; doi:10.1136/bmjopen-2014-005318), 2014-07-12
Supplement: bmjopen-2014-005318.reviewer_comments.pdf [file bmjopen-2014-005318.reviewer_comments.pdf]

## PEER REVIEW HISTORY

BMJ Open publishes all reviews undertaken for accepted manuscripts. Reviewers are asked to complete a checklist review form (<http://bmjopen.bmj.com/site/about/resources/checklist.pdf>) and are provided with free text boxes to elaborate on their assessment. These free text comments are reproduced below. Some articles will have been accepted based in part or entirely on reviews undertaken for other BMJ Group journals. These will be reproduced where possible.

### ARTICLE DETAILS

|                            |                                                                                                                  |
|----------------------------|------------------------------------------------------------------------------------------------------------------|
| <b>TITLE (PROVISIONAL)</b> | Postnatal epigenetic modification of glucocorticoid receptor gene in preterm infants: a prospective cohort study |
| <b>AUTHORS</b>             | Kantake, Masato; Yoshitake, Hiroshi; Ishikawa, Hitoshi; Araki, Yoshihiko; Shimizu, Toshiaki                      |

### VERSION 1 - REVIEW

|                        |                                                                      |
|------------------------|----------------------------------------------------------------------|
| <b>REVIEWER</b>        | Satoshi Kusuda<br>Tokyo Women's Medical University<br>Tokyo<br>Japan |
| <b>REVIEW RETURNED</b> | 02-May-2014                                                          |

|                         |                                                                                                                                                                                                                                                                                                                                                                                                                                                                                                                                                                                                                                                                                                                                                                                                                                                                                                                                                                                                                                                                                                    |
|-------------------------|----------------------------------------------------------------------------------------------------------------------------------------------------------------------------------------------------------------------------------------------------------------------------------------------------------------------------------------------------------------------------------------------------------------------------------------------------------------------------------------------------------------------------------------------------------------------------------------------------------------------------------------------------------------------------------------------------------------------------------------------------------------------------------------------------------------------------------------------------------------------------------------------------------------------------------------------------------------------------------------------------------------------------------------------------------------------------------------------------|
| <b>GENERAL COMMENTS</b> | <p>Ref 33<br/>"Matsumoto" should be "Masumoto".</p> <p>This paper describes the epigenetic modification of glucocorticoid receptor in neonates. The discussion are very clear after revision. Furthermore, the results are very interesting.</p> <p>General comments:</p> <p>1. Abstract<br/>This study just showed the difference in an epigenetic modification among the infants after birth. Factors which can explain this difference is not clear yet. It is difficult to indicate the stress as a causal relationship. Furthermore, the implication of the gene modification is not known at the moment. Please change the "Conclusion".</p> <p>2. Discussion<br/>Please focus on the study results, and limit the speculation on the development of adult diseases.<br/>Please mention the limitation of the study, not in "Conclusion".</p> <p>Minor comments:<br/>The change shown in the preterm infants could be seen even in infants who did not need admission in NICU. How to exclude the possibility that these changes came from just evolutionary changes in preterm infants?</p> |
|-------------------------|----------------------------------------------------------------------------------------------------------------------------------------------------------------------------------------------------------------------------------------------------------------------------------------------------------------------------------------------------------------------------------------------------------------------------------------------------------------------------------------------------------------------------------------------------------------------------------------------------------------------------------------------------------------------------------------------------------------------------------------------------------------------------------------------------------------------------------------------------------------------------------------------------------------------------------------------------------------------------------------------------------------------------------------------------------------------------------------------------|

|                        |                                                                              |
|------------------------|------------------------------------------------------------------------------|
| <b>REVIEWER</b>        | Eleanor Molloy<br>DEpartment of PAediatrics, Trinity College Dublin, Ireland |
| <b>REVIEW RETURNED</b> | 22-May-2014                                                                  |

**GENERAL COMMENTS**

The authors compare term and preterm methylation rate of the glucocorticoid receptor gene. The differences found between term and preterm infants was associated with “environmental stress”. This is an interesting paper and I have previously reviewed it. The authors have significantly altered and improved their description of the methods especially the clinical definitions.

**Abstract**

In the abstract the authors could explain the relevance of glucocorticoid receptor gene polymorphism.

**Methods**

What is the definition of “maternal contact”.

Although the criteria mention <37weeks for preterms they only used < 35 weeks as a cutoff. Several of the definitions were unconventional including:

birth asphyxia Apgar <7 at 5 mins. In addition Late circulatory collapse is not well-recognised and what was the baseline blood pressure. The reference for LCC should be included in methods. The conventional definition of CLD is not usually Xray findings and additional oxygen at 28 days and could the authors reference it. The authors mention that ROP is defined by an oculist but not by conventional definitions. Systemic inflammation needs a definition and reference. 10uL of blood seems a very tiny amount for DNA extraction and further explanation of methods would be helpful.

**Results:**

Comments such as preterm infants have significantly lower gestational age and birthweight may be redundant.

Table1 : the demographics could be described in the text rather than in a table

Table 2: Difficult to interpret and could perhaps be written in text instead

**Discussion**

The authors mention an adverse environment but this has not been described earlier. The association with “child maltreatment induced DNA methylation” needs further explanation.

## VERSION 1 – AUTHOR RESPONSE

Reviewer 1: Ref 33 "Matsumoto" should be "Masumoto".

This paper describes the epigenetic modification of glucocorticoid receptor in neonates. The discussion are very clear after revision. Furthermore, the results are very interesting.

Our response:

According to the reviewer's assignment, we have corrected the author's name in Ref 33.

Reviewer: 2

The authors compare term and preterm methylation rate of the glucocorticoid receptor gene. The differences found between term and preterm infants was associated with "environmental stress". This is an interesting paper and I have previously reviewed it. The authors have significantly altered and improved their description of the methods especially the clinical definitions.

Our response: none
